# Supplementary material for: Water mass structure and the effect of subglacial discharge in Bowdoin Fjord, northwestern Greenland
Source: Copernicus journal article supplement (doi:10.5194/os-2019-33), 2019-05-06
Supplement: Supplementary file [file os-2019-33-AC1-supplement.pdf]

Revision of the manuscript [Paper #os-2019-33] “Water mass structure and the effect of subglacial discharge in Bowdoin Fjord, northwestern Greenland” by Ohashi et al.

We thank editor and the two referees for careful reading of our manuscript and for giving useful comments and suggestions. We have addressed the raised referee comments and explained how we revised. The major changes are listed as follows.

• Title:

“Vertical distribution of water mass properties under the influence of subglacial discharge in Bowdoin Fjord, northwestern Greenland”

• Structure of the paper:

Sect. 1: Introduction

Sect. 2: Study area

Sect. 3: Observational data and methods

Sect. 4: Observational results

Sect. 5: Numerical experiments

5.1 Experimental settings

5.2 Experimental results

Sect. 6: Discussion

Sect. 7: Conclusions

The referee comments are written in bold and replies from the authors follow the referee comments. Changes are highlighted in the manuscript using the [blue color](#) (response to comment from Referee #1) and [green color](#) (Referee #2).

-----  
[Response to Comment from Referee #1](#)

**Anonymous Referee #1**

**The manuscript by Ohashi et al. examines water mass structure near a subglacial discharge plume in Bowdoin Fjord. They focus on two sample times (from 2014 and 2016) and compare and contrast the differences between the two samples. They focus on turbidity, in addition to the common/traditional temperature and salinity property analyses. They also run a model to better understand and explain the subglacial discharge and water properties that lead to the observations they have. I am not a modeler and so I cannot address that part of the paper very well, but overall I think this is a well written paper and the topic and presentation is appropriate to this journal. I have a few major comments (conclusions about sediment visibility at the surface; code) and some minor comments.**

[Thank you very much for your positive assessment and constructive comments. We have addressed](#)

the main points as follows and responded to all comments.

- We have recalculated the fraction and reperformed the the numerical experiments using the pressure dependent temperature as the temperature of subglacial discharge.
- We have reperformed the numerical experiments using the RACMO output.
- We have uploaded the model source code including documentation of the routines and non-model codes to Zenodo.

**You use Equation 1 and cite Chauché et al. (2014) among others. I think this citation should be removed, because Chauché et al. (2014) does not use the equation that you use. Theirs is different because it contains a typo (a sign change).**

We have removed Chauché et al. (2014) in Page 4 Line 12.

**Page 3 Line 35/36: Temperature and salinity do not follow the same advection diffusion equation, but you state that they do. Also, should theta here be something other than 0, assuming the subglacial discharge water is at the same temperature as the basal ice, which is not 0 due to pressure dependence of the phase change temperature?**

Since the grid spacing of the present model does not resolve molecular diffusivity, the diffusivity referred in the text is actually the eddy diffusivity, whose origin is the net transport by subgrid-scale turbulent eddies. Therefore, the diffusivity coefficients for both temperature and salinity should be the same value in the present model.

Also, we have recalculated the freshwater fraction and reperformed the numerical experiments using  $\theta_{sg} = -0.15$  °C as the temperature of subglacial discharge due to the pressure dependence of the phase change temperature. Please see Page 4 Lines 6–7 and Page 7 Line 22.

**Page 7 Line 42: Seems like you should cite Chu (2012) here when you cite yourself. It seems odd that your 2016 paper also did not cite Chu 2012.**

According to your comment, we have cited Chu et al. (2012) in Page 8 Line 32. Chu et al. (2012) focused on the margin of confined proglacial river and narrow fjord, and its environment is therefore significantly different from that of the open ocean in Ohashi et al. (2016). Thus, Ohashi et al. (2016) did not cite Chu et al. (2012). In this paper, we think that Chu et al. (2012) is more proper citation than Ohashi et al. (2016).

**Page 8 line 25: Your 2016 paper used a sensor that was not high enough resolution to distinguish between subglacial discharge and surface streams that deliver sediment to the fjord surface. I disagree with your claim that subglacial and surface stream delivered sediment behave the same. Large(r) volumes of subglacial discharge are more likely to reach the surface and cause the v-**

or u-shaped sediment plume often seen at the front of marine terminating glaciers. Even larger plumes may make that sediment surface pool even bigger (as you state and support with citations further down the same page). But those pools always disappear rather quickly, and I don't think that even larger subglacial discharge would impact the visual sediments at the fjord surface over large areas as you state in the paragraph beginning on line 25.

We agree with your suggestion and have removed this part in Page 9 Lines 21–23.

**Why don't you force your model with RCM runoff estimates? Stevens et al (2016) and Mankoff et al (2016) have shown that RCM runoff estimates do approximately align with estimated runoff derived from plume & fjord observations.**

According to your suggestion, we have reperformed the numerical experiments using the subglacial discharge flux estimated from the Regional Atmospheric Climate Model (RACMO) runoff data (Fig. R1) (Please see Page 7 Lines 34–36). Although the amount of RACMO discharge was an order smaller than those previously assumed, the qualitative result was basically the same. We have added the part on the subglacial discharge estimates in Page 3 Lines 14–20 as follows.

“To help estimate the subglacial discharge conditions for BG, we used Regional Atmospheric Climate Model (RACMO) 2.3p2 runoff data downscaled to 1 km (Noël et al., 2016; Noël et al., 2018). The catchment of the glacier was determined from the Greenland Ice Mapping Project digital elevation model (Howat et al., 2014). In summer (June–August), the daily mean amount of subglacial discharge estimated from the RACMO data varied greatly ( $19 \pm 16 \text{ m}^3 \text{ s}^{-1}$  in 2014 and  $21 \pm 18 \text{ m}^3 \text{ s}^{-1}$  in 2016). Using the daily mean values of the five days prior to the observation dates (Mankoff et al., 2016), we perform numerical experiments (see Sect. 5 for details). The daily mean amount of subglacial discharge over five days in 2016 ( $45 \text{ m}^3 \text{ s}^{-1}$ ) was estimated to be 25 % greater than that in 2014 ( $36 \text{ m}^3 \text{ s}^{-1}$ ).”

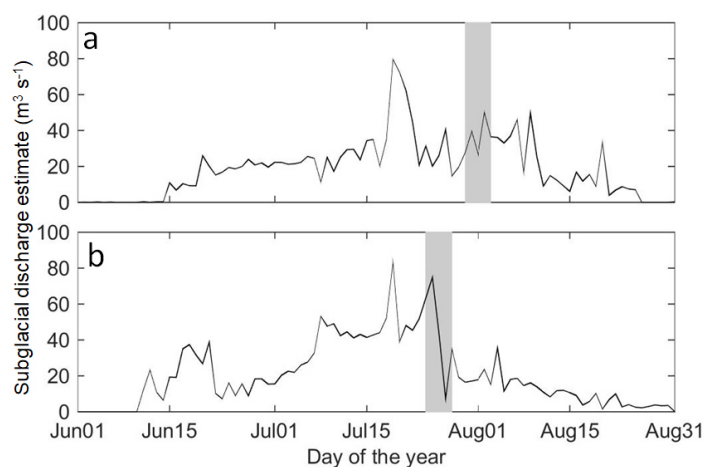

Figure R1. Daily subglacial discharge estimates of Bowdoin Glacier in (a) 2014 and (b) 2016. Gray bar shows the five days prior to the observation date.

**Code Availability:** I commend you for releasing some of your code, but I think it is far from sufficient for me to suggest publication of this paper. I downloaded and browsed the Git repository and found it lacking. I'd like to see the following code supplied with this paper:

- 1) Code archived at a permanent location such as Zenodo.
- 2) Zip file extract or GIT tag or something pointing to the specific code that was run, not just a living archive which in a few years may not reflect the code used in this study.
- 3.1) Documentation of the routines. There are almost no comments in your code!
- 4) Not just "the model code" but an archive of the configuration and setup that you used to do the work in this paper. Where are the input files? The initial and boundary condition setup? etc. There should be data files and preprocessing scripts included

According to your comments on code availability (1-4), we have added the English version of the documentation of the routines (README\_en), which explains how to compile/build/run the model, to the git repository published at <http://lmr.aori.u-tokyo.ac.jp/feog/ymatsu/kinaco.git>. Additionally, we have uploaded the used version of model source code, the configuration namelist file, all input files, and preprocessing scripts to Zenodo (<https://zenodo.org/record/3532803>). Please see Page 12 "Code availability" and "Data availability".

**5)Non-model code should also be provided. Please package and release your analysis scripts, the code to generate your figures, etc.**

We have packaged and uploaded analysis scripts and the codes to generate the figures to Zenodo (<https://zenodo.org/record/3532803>).

**Figures:** Please read Thyng et al (2016; <http://dx.doi.org/10.5670/oceanog.2016.66>) and consider re-doing your figures with better colorbars than what appears to be Matlab Jet.

According to Thyng et al. (2016), we have changed the colorbars of figures 3-7, 10, and C1.

---

Response to Comment from Referee #2

Anonymous Referee #2

General Comments:

The manuscript by Ohashi et al. 2019 presents observations from Bowdoin Fjord in northwest Greenland from 2014 and 2016 and supports these observations with interpretations from a 3D nonhydrostatic model. The study is mostly a straightforward report of the measurements between these two years in terms of the stratification and turbidity, which seems to be competent. The observational portion of the work is clear with a topic and discussion that is appropriate for this journal. A scientifically-interesting part is the comparison between the two summers, from which the authors draw conclusions about the influence of variations in the

subglacial discharge and stratification. However, the validity of such a comparison must be addressed with greater care (a few suggestions for this are provided in the specific comments). For instance, might we observe similar differences in turbidity if we simply made the measurements in two different weeks within the same melt season (due to intrinsic variability in the discharge rate)? This also goes hand-in-hand with how the short 5-day integration times in the numerical experiments may be enough to stabilize plumes, but not necessarily enough to set up a steady-state fjord stratification (discussed in specific comments). In addition to integration time, there are also additional issues/caveats that must be addressed with respect to the model configuration (resolution and boundary conditions) used to interpret the observational results. The connection between the model and the observations is also rather tenuous - a direct comparison is not well-established, leaving the authors to draw inferences from a few model experiments to help explain the differences they observe between 2014 and 2016. It is unclear whether the model experiments actually yield any new understanding (of the roles of discharge and stratification) not available from previous studies. If not, it's not clear why the model is needed at all; if so, then why aren't these findings reported as part of the manuscript's results section? Finally, in general, the manuscript is not particularly well written (some technical comments are provided but is not exhaustive) - it could benefit from editing by a native English speaker to improve clarity.

We would like to thank you very much for your thorough reading of our manuscript and providing very constructive comments. We have addressed the main points as follows to respond to your comment.

- We have re-performed the numerical experiments with changing the settings.
- We have added the part of model results.

#### Specific Comments:

**Page 1, Line 16: What is the significance of the 60-80 m depth range? What does “temperature profiles were distinctively different” mean specifically? Be more specific about what “a larger fraction” means. In general, this result seems contradictory/unclear: there is more discharge in 2016, but higher discharge fraction at 15-40m in 2014, yet there is also higher turbidity near the surface in 2016. The authors attribute all this to different stratification/discharge flux combinations but it's not at all clear why this is the case from the abstract.**

This sentence represents the depth that submarine melting layer and seasonal pycnocline layer developed (Please see Sects. 6.3 and 7). However, because this sentence is unclear, we have removed this sentence from the abstract.

**Page 1, Line 29-32 and other lines which use similar citations:** This is a subtle point in the framing of the paper in an atmospheric/ice sheet perspective vs. a growing body of literature on the ocean-driven variability of the ice sheet. While these lines provide an accurate summary of some recent literature on Greenland mass budgets (but also see King et al., 2018: <https://doi.org/10.5194/tc-12-3813-2018>, Mankoff et al., 2019: <https://doi.org/10.5194/essd-11-769-2019>), perhaps rewording or additional clarification is necessary to leave the reader with the right impression of the role of ocean in this process. The mass budgets cited use a “flux gate” further up-glacier where surface speed and ice thickness is used to estimate solid ice passing through this gate which is then assumed to be eventually calved into the ocean. This however does not account for surface thinning downstream or submarine melt at the terminus. A short discussion on the ocean’s role in undercutting glaciers (through submarine melt) is presented in Rignot et al., 2015: <https://doi.org/10.1002/2015GL064236> and Straneo et al., 2015: <https://doi.org/10.1146/annurev-marine-010213-135133>. This perspective is more relevant for this study than many of the atmosphere/ice references that are presently cited and a discussion focusing on the ocean’s role would help set the scene for this study.

To clarify the role of ocean on Greenland mass budgets, we have rewrote the introduction in Page 1 Lines 29–33 as follows.

“Increased ice discharge has been potentially induced by increased submarine melting and iceberg calving (Catania et al., 2018; Motyka et al., 2011; Straneo and Heimbach, 2013). At the ice front of marine-terminating outlet glacier, surface melt-induced meltwater discharge drives the rapid submarine melting (e.g., Motyka et al., 2013) and hence promote to iceberg calving due to undercutting of the ice front (O’Leary and Christoffersen, 2013; Rignot et al., 2015). Thus, meltwater discharge from marine-terminating glaciers plays an important role in controlling ice loss.”

**Page 1, Line 37-41:** While this is an accurate account of recent observations on exiting plume water masses, it should be noted that plume meltwater fractions (cited as 7-10 percent) depends strongly on the discharge strength and depth of the plume source (which together prescribe the degree of entrainment and neutral buoyancy of the exiting plume water mass). Bendtsen and Mankoff’s measurements both focus on fjords that are shallow and have a plume undergoing weak overall entrainment i.e. they exit at the surface instead of at mid-depth. In general, the meltwater fractions should be much lower for deeper plume sources or plumes that undergo greater entrainment. Here, you are focusing on a shallow discharge plume that rises to the surface, but it is important to point out that many plumes do not fall into this category and why, as well as why shallow plumes have such a high plume meltwater fraction (see Straneo et al.

**2015 for a relevant discussion on plumes: <https://doi.org/10.1146/annurev-marine-010213-135133>).**

We have added the point that why many plumes cannot reach the surface and why shallow plumes have a high plume meltwater fraction in Page 1 Line 38–Page 2 Line 2 as follows.

“Observations in the Greenlandic shallow fjords have revealed that plume surface waters consist of 7–10 % subglacial discharge and ~90 % entrained fjord waters (Bendtsen et al., 2015; Mankoff et al., 2016), indicating that subglacial discharge plumes transport significant amounts of ambient deep water to the fjord surface. The plumes have higher fraction of subglacial discharge than those in the deep fjords due to greater entrainment of ambient water. Additionally, in the deep fjords, many plumes cannot reach the surface because the plumes become neutrally buoyant before reaching the surface (Straneo and Cenedese, 2015).”

**Page 2, Line 8: “The subglacial discharge distribution into a fjord” is better described as “vertical distribution of outflowing plume water” since the subglacial discharge only exists as the terminus depth and is not “distributed,” but rather the plume outflow can be vertically distributed. There are a few other cases throughout the paper where this distinction could be made clearer. Also, note that the plume outflow distribution cited is more relevant for plumes that reach neutral buoyancy at mid-depths (instead of a concentrated outflow at the surface, as in this study). Consider rewording other instances of this including Page 3, Line 8, and others. We have changed “the subglacial discharge distribution” to “vertical distribution of outflowing plume water” through the manuscript.**

**Page 2, Line 11: What is the “realistic influence?” In what way were previous evaluations of its influence not realistic?**

The sentence “The realistic influence on the subglacial discharge distribution has not been assessed in detail” was misleading. Chauché et al. (2014) did not perform the numerical experiments and did not calculate the subglacial discharge fraction. Thus, they cannot quantitatively assess the impact of change in the amount of discharge on subglacial discharge fraction change. We mean to say that the relationship between the change in the amount of discharge and observed subglacial discharge fraction has not been assessed quantitatively. We have changed “The realistic influence on the subglacial discharge distribution has not been assessed in detail.” to “The relationship with observed subglacial discharge fraction has not been assessed quantitatively.” in Page 2 Line 15.

**Page 5, Line 9: Considering renaming the title to Section 4 as “Observational Results” or similar,**

since it can be confusing that Sect. 3.3 discusses the numerical experiments, which is not discussed again until Sect. 5.2. An alternative, which may be preferable is restructuring the sections so that all the observational discussion precedes the numerical simulations e.g. Sect. 3: **Observational Data and Methods**, Sect. 4: **Observational Results**, Sect. 5: **Numerical Experiments**.

We have added Sect. 5 and changed the structure of paper as follows.

Sect. 3: Observational data and methods

Sect. 4: Observational results

Sect. 5: Numerical experiments

5.1 Experimental settings

5.2 Experimental results

Page 4, Sect. 3.3 general comments: In general, the numerical experiments would benefit from higher resolution (which would also improve the quality of the numerical results and many of the figures including Fig. 11, B1, and B2) as well as caveats/justifications for certain choices such as the seafloor no-slip conditions and the integration time.

(a) Resolution Issue: There is a strong concern that the results here are strongly dependent on the horizontal and vertical resolution. For instance, the plume (assuming a point plume with entrainment coefficient of  $\alpha = .1$ , although a similar case can be made for a line plume of finite width) radius at the surface for such cases would be approx. 20m, which is already subgridscale. Many current numerical studies including plumes implement some version of a subgridscale plume parameterization (Xu et al. 2013, Cowton et al. 2015) unless they are extremely high resolution ( $< 1$  m horizontal). Also, not discussed here is why the plume source (choice of outflow dimensions) is chosen to be 200 m wide and 50 m tall. Is there an observational justification for these dimensions or was it chosen such that the source was multiple grid points high and wide? A source that is 50 m tall seems especially large given that the depth of the plume is 210m and much of the change in density of the plume occurs near the source (i.e. within the first 50m). Therefore, it is strongly recommended to run these runs at higher resolution (and to reduce the height of the plume source) to observe how much the results would vary, or demonstrate the convergence of the relevant metrics with respect to resolution.

According to your comment, we have changed the model resolution (20 m horizontally, 5 m vertically) and reduced the height and width of the plume source (40 m wide  $\times$  10 m high; 400 m<sup>2</sup>). Please see Page 7 Lines 16–18.



**(b) No-slip conditions:** Since the access of the AW is controlled by a small layer (only a few grid points tall at 1-2km from the ice front), this choice in bottom boundary condition is likely to dampen the ability of AW to fuel the entrainment from the plume. The choice of no-slip boundary conditions would only be justified if the viscous sublayer were resolved. Consider quadratic drag (which is more defensible) bottom layer or demonstrate insensitivity to/justify the choice of no-slip conditions. What is prescribed at horizontal boundaries? Perhaps an increase in vertical resolution in (a) would help as well.

We have considered quadratic drag bottom layer. The quadratic drag coefficient is set to  $2.5 \times 10^{-3}$ . Please see Page 7 Lines 27–28. Also, rigid wall boundary conditions are used for eastern and western ends.

**(c) Integration time:** Please consider justifying the integration time of five days (or stating the implications or caveats associated with such a short integration time) or running the numerical simulations for longer. Although the plume rise time is much less than five days, the residence time within the fjord (timescale associated with volume of the fjord divided by rate of overturning circulation) is likely much longer and the response of the background stratification to the water mass transformation due to plume entrainment should be on the timescale of months (see Carroll et al., 2015).

Because we have no observational data before subglacial discharge, it is difficult to assess the long-term formation process of observed fjord stratification influenced by subglacial discharge in detail. Thus, we have focused on the short-term transitional process of the subglacial discharge in the numerical experiments to interpret the observational data. The model is integrated for seven days from a state of rest, which is sufficient time for the subglacial discharge tracer to reach the southern boundary. We have added the caveats associated with such a short integration time as follows.

In Page 7 Lines 29–33:

“The model is integrated for seven days from a state of rest, which is sufficient time for the subglacial discharge tracer to reach the southern boundary. Note that the numerical experiment results represent the transitional process of the subglacial discharge tracer, and are not applicable to long-term behavior of subglacial plume. Thus, we do not discuss the response of the fjord stratification to the water mass transformation due to plume entrainment on the timescales of months.”

In Page 10 Lines 29–33: We have already described as follows.

“However, this study revealed the transitional processes of subglacial discharge plume over a

relatively short time scale. To fully understand the longer-term interactions of subglacial discharge and fjord stratification (e.g., seasonal and interannual variations), we need to perform long-term oceanic observations and numerical experiments to capture the realistic nature of discharge and submarine melting over a much broader model domain.”

**Page 7, Line 42:** A caveat which may be worth noting is that turbidity at the fjord surface may only be a reasonable proxy if the plume is able to reach the surface, which depends on the degree of entrainment.

According to your suggestion, we have added “It should be noted that turbidity at the fjord surface is only a reasonable proxy if turbid subglacial discharge plume is able to reach the surface, which depends on the degree of entrainment.” in Page 8 Lines 34–36.

**Page 8 (throughout):** Consider an additional run ST16Q600, which uses the stratification observed in 2016, with a discharge that is 20 percent higher than the CTRL run, since you state the PDD is 20 percent higher in 2016 compared to 2014, so a more realistic representation of the 2016 state would take into account the increase in discharge as well.

We have performed the additional run (ST16Q45, which uses the stratification observed in 2016, with a discharge that is higher than CTRL) and added the description on the ST16Q45 run in Page 12 Lines 12–19 (Appendix C).

**Page 8 (sect. 5.2):** Why are the model results presented in the paper’s discussion section - aren’t these also results?

This paper mainly focused on the observations and thus the model results were shown only in the discussion section in the previous version. We agree with your comment and have added the section of model results (Please see Sect. 5.2).

**Page 22 (also, see other relevant figures and discussions):** Each of these measurements represents a snapshot of the turbidity, temp, salinity etc., but are these snapshots representative of the entire 2014 and 2016 melt seasons? How much variability in the discharge rate, turbidity etc. would we expect within a single melt season? I’m not sure whether it’s possible to even distinguish differences between the 2014 and 2016 melt seasons from a single sample from each season. If not, then attempting to explain them using the model is not a valid approach.

We do not think that these snapshots are representative of the entire 2014 and 2016 melt seasons throughout the water column. However, the features in the deeper layer of the fjord can be the results

for the entire melt season.

In Fig. R1 (Please see Response to Comment from Referee #1 Why don't you force your model with RCM runoff estimates?....), the estimated daily mean discharge rate varied largely ( $19 \pm 16 \text{ m}^3 \text{ s}^{-1}$  in 2014 and  $21 \pm 18 \text{ m}^3 \text{ s}^{-1}$  in 2016). Moreover, the vertical distribution of turbidity, temperature, and salinity in the shallow layer that plume water spreads can be strongly affected by the short-term change in discharge rate. Thus, these vertical distribution in the shallow layer varied at short time scales. In this study, observational results on the turbid subglacial plume water and numerical model results represent the short-term transitional process of subglacial discharge plume. We have added the caveats in Page 8 Lines 42–43 as follows. “It should be noted that the observational data represent snapshots in summer, and not the entire melt seasons. Thus, we discuss only the difference in the short-term transitional process of outflowing plume water.”

On the other hand, as shown in Sect. 6.3, submarine melting layer was developed in 2014 and seasonal pycnocline in 2016. These processes could be influenced by the thick warm AW layer and the enhancement of winter vertical mixing, and thus are characterized as the long-term process (annual). Therefore, we think that it is valid to consider the difference in these developed layer (submarine melting and seasonal pycnocline) as the interannual difference. We have already described in Page 2 Lines 21–23 as follows. “The properties of the water masses can change on various time scales from intra-seasonal to interannual or longer-term, reflecting the variabilities on much larger spatial scales.”

To fully link the multi-year observations of ocean environments and realistic subglacial discharge scenario are far beyond the capability of the present data and computational resource. We hope this attempt to be the first step toward such kind of observation and modeling.

#### **Technical Corrections:**

**Page 1, Line 1 and many others. When “structures” is used to denote the properties of vertical water mass profiles i.e. “water structures”, this should instead be “vertical density profiles” or equivalent for clarity. For instance, consider changing the title to: “The effect of subglacial discharge on vertical density profiles in Bowdoin Fjord, north- western Greenland.”**

We have changed the title “Water mass structure and the effect of subglacial discharge in Bowdoin Fjord, northwestern Greenland” to “Vertical distribution of water mass properties under the influence of subglacial discharge in Bowdoin Fjord, northwestern Greenland” in Page 1 Lines 1–2 and changed “water mass structure” to the other words (e.g., properties of vertical water mass profiles) through the manuscript.

**Page 1, Line 23: Consider rewording the last sentence of the abstract for clarity e.g.: “Fjord**

**stratification is an important factor controlling the vertical distribution of freshwater outflow due to subglacial discharge strength and entrainment. The fjord stratification does not influence the magnitude of subglacial discharge ‘amount’, as is implied in the original statement.**

We have changed the last sentence “This study indicates that ambient fjord stratification difference is an important factor controlling the vertical distribution of subglacial discharge, together with its amount.” to “This study indicates that both fjord stratification and the amount of discharge are important factors in controlling the vertical distribution of freshwater outflow.” in Page 1 Lines 22–23.

**Page 2, Line 34: “...of a proglacial fjord.” Page 2, Line 42: Correct to present tense:**

**“This study focuses on BF ....”**

Corrected. Please see Page 2 Line 39 and Page 3 Line 4.

**Page 3, Line 1: Correct to: “In June and July, the sea ice melts rapidly exposing the open ocean surface.”**

Corrected. Please see Page 3 Line 6.

**Page 3, Line 6. If the depth of PW/AW interface is between 50m and 150m, then 210m should always be below the AW and PW interface. In Fig. 12, the schematic shows a PW/AW interface that is between 175m and 225m.**

This sentence represents the depth of PW and AW cores. PW/AW interface is between around 210m as shown in Figure 12. To clarify, we have changed “corresponds to the depth between warm AW (at the deepest part of the fjord) and cold PW (depth: 50–150 m)” to “corresponds to the depth between warm AW and cold PW cores” in Page 3 Line 11.

**Page 3, Line 24: “0.01” psu? Page 3, Line 36: “...which subsequently spreads due to entrainment.”**

Corrected. Please see Page 3 Line 36 and Page 4 Lines 5–6.

**Page 4, Line 9 and others: Consider another word instead of “endmember” which is unclear when it is used... perhaps “source?”**

We have changed “endmember” to “source” through the manuscript.

**Page 5, Line 27 and others: Consider a more compact notation  $\theta_{\max}^{2014}$ , etc.**

We have changed  $\theta_{\max 2014}$  and  $\theta_{\max 2016}$  to  $\theta_{\max}^{2014}$  and  $\theta_{\max}^{2016}$ , respectively.

**Page 9, Line 29:** As a point of clarification, the subglacial discharge that exits near the surface as in this study would lighten the surface layers and increase stratification, but if it preferentially lightens intermediate/deeper layers, it would act to decrease stratification as is observed in other studies (see Jackson et al., 2017: <https://doi.org/10.1002/2017GL073602>).

We have changed the sentence “In general, fjord stratification is expected to be stronger after subglacial discharges into the fjord, because a density difference is generated.” to “Fjord stratification is expected to be stronger after subglacial discharge that exits near the surface as in this study, because subglacial discharge would lighten the surface layers.” in Page 10 Lines 28–29.

**Page 9, Line 43:** “In turn, a prominent local ... was detected around 60 m in 2016, which was significantly warmer than the local maximum in 2014.”

Corrected. Please see Page 10 Line 42.

**Page 16, Line 4:** Correct to: “... (blue in 2014, red in 2016, both inside Bowdoin Fjord, and green in 2016, outside Bowdoin Fjord).”

Corrected. Please see Page 18 Lines 4–5.

**Fig.12 and to a lesser extent, Fig. 13:** Consider esthetic improvements that would improve this figure including fewer arrows, clearer color/font contrast, labels, etc. Is the PW layer here meant to only represent the PW core? It may be clearer to differentiate between  $\Theta_{min}$  and the full PW layer. It is not clear exactly which portion of the vertical column has a stronger vs. weaker stratification.

We have changed figures 12 and A1 as follows.

- Figure 12:

We have used fewer arrows.

We have used color gradient between PW and AW cores.

We have represented the strength of stratification clearer.

- Figure A1:

We have removed arrows.

We have changed the color of line indicating the submarine meltwater fraction.

# Vertical distribution of water mass properties under the influence of subglacial discharge in Bowdoin Fjord, northwestern Greenland

Yoshihiko Ohashi<sup>1</sup>, Shigeru Aoki<sup>2</sup>, Yoshimasa Matsumura<sup>3</sup>, Shin Sugiyama<sup>2,4</sup>, Naoya Kanna<sup>4</sup>, Daiki Sakakibara<sup>4</sup>

5 <sup>1</sup>Department of Ocean Sciences, Tokyo University of Marine Science and Technology, Tokyo, 108-8477, Japan

<sup>2</sup>Institute of Low Temperature Science, Hokkaido University, Sapporo, 060-0819, Japan

<sup>3</sup>Atmosphere and Ocean Research Institute, The University of Tokyo, Kashiwa, 277-8564, Japan

<sup>4</sup>Arctic Research Center, Hokkaido University, Sapporo, 001-0021, Japan

*Correspondence to:* Yoshihiko Ohashi (yohash0@kaiyodai.ac.jp)

10

**Abstract.** Subglacial discharge has significant impacts on water circulation, material transport, and biological productivity in proglacial fjords of Greenland. To help clarify the fjord water properties and the effect of subglacial discharge, we investigated the properties of vertical water mass profiles of Bowdoin Fjord in northwestern Greenland based on summer hydrographic observations, including turbidity, in 2014 and 2016. We estimated the fraction of subglacial discharge from the observational data and interpreted the observed differences in subglacial plume behavior between two summer seasons with the numerical model results. ~~At a depth of 60–80 m, temperature profiles were distinctively different in 2014 and 2016, and a larger fraction of submarine meltwater was detected in 2014.~~ At a depth of 15–40 m, where the most turbid water was observed, the maximum subglacial discharge fractions near the ice front were estimated to be ~6 % in 2014 and ~4 % in 2016. The higher discharge fraction in 2014 was likely due to stronger stratification, as suggested by the numerical experiments performed with different initial stratifications. Turbidity near the surface was higher in 2016 than in 2014, suggesting a stronger influence of turbid subglacial discharge. The higher turbidity in 2016 could primarily be attributed to a greater amount of subglacial discharge, as inferred from the numerical experiments forced by different amounts of discharge. This study indicates that both fjord stratification and the amount of discharge are important factors in controlling the vertical distribution of freshwater outflow.

## 25 1 Introduction

In recent decades, the rate of ice mass loss from the Greenland ice sheet has increased from  $51 \pm 65 \text{ Gt a}^{-1}$  in 1992–2000 to  $211 \pm 37 \text{ Gt a}^{-1}$  in 2000–2011 (Shepherd et al., 2012). The acceleration of ice mass loss has been driven by increased surface melting and ice discharge from marine-terminating outlet glaciers (e.g., Enderlin et al., 2014; van den Broeke et al., 2016). Increased ice discharge has been potentially induced by increased submarine melting and iceberg calving (Catania et al., 2018; Motyka et al., 2011; Straneo and Heimbach, 2013). At the ice front of marine-terminating outlet glacier, surface melt-induced meltwater discharge drives the rapid submarine melting (e.g., Motyka et al., 2013) and hence promote to iceberg calving due to undercutting of the ice front (O’Leary and Christoffersen, 2013; Rignot et al., 2015). Thus, meltwater discharge from marine-terminating glaciers plays an important role in controlling ice loss.

Meltwater discharge from marine-terminating glaciers significantly affects fjord water circulation, material transport, and biological productivity (e.g., Carroll et al., 2015, 2017; Chu, 2014; Lydersen et al., 2014). Meltwater produced at the ice surface drains through crevasses to the base of the glacier. The submerged meltwater entrains sediments from a subglacial drainage system, gaining high turbidity. Once it flows out from the subglacial conduit, the turbid subglacial discharge forms an upwelling plume, entraining the ambient fjord water (Jenkins, 1999, 2011; Sciascia et al., 2013; Xu et al., 2013). Observations in the Greenlandic shallow fjords have revealed that plume surface waters consist of 7–10 % subglacial discharge and ~90 % entrained fjord waters (Bendtsen et al., 2015; Mankoff et al., 2016), indicating that subglacial discharge plumes transport significant amounts of ambient deep water to the fjord surface. The plumes have higher fraction of subglacial discharge than

40

those in the deep fjords due to greater entrainment of ambient water. Additionally, in the deep fjords, many plumes cannot reach the surface because the plumes become neutrally buoyant before reaching the surface (Straneo and Cenedese, 2015).

After upwelling, a substantial fraction of the subglacial discharge plume submerges and extends offshore at the lower part of the warm, fresh surface water (SW; Chauché et al., 2014; Xu et al., 2013). A turbid water layer is observed at the subsurface where subglacial discharge spreads after the upwelling (Chauché et al., 2014; Stevens et al., 2016). Because the ambient deep water delivered by the plume is rich in nutrients, subglacial plume formation can enhance marine biological productivity (Arendt et al., 2011; Cape et al., 2019; Kanna et al., 2018; Lydersen et al., 2014; Meire et al., 2017). Conversely, high concentrations of suspended sediments near the fjord surface might reduce light availability (Retamal et al., 2008). Therefore, it is important to understand the detailed behavior of subglacial discharge under various conditions of ambient water properties. However, only a few studies have described the temporal variations of the vertical distribution of outflowing plume water and variables such as suspended sediment.

In situ observations have suggested that changes in the amount of subglacial discharge control the vertical distribution of outflowing plume water (Chauché et al., 2014). Subglacial discharge is an intermittent process (e.g., Bartholomaeus, et al., 2015; Gimbert, et al., 2016). Although change in the amount of subglacial discharge can be an important controlling factor, the relationship with observed subglacial discharge fraction has not been assessed quantitatively.

In addition to the amount of subglacial discharge, fjord stratification affects the behavior of subglacial discharge plume (e.g., Carroll et al., 2015). Warm, salty water of Atlantic origin (Atlantic Water: AW; e.g., Chauché et al., 2014; Straneo et al., 2012) occupies the deepest parts of Greenlandic fjords. The oceanic heat from AW can induce freshwater supply via melting of the submarine glacier front, producing submarine meltwater (e.g., Straneo and Heimbach, 2013). Cold and relatively fresh water of Arctic origin (Polar Water: PW; e.g., Chauché et al., 2014; Myers et al., 2007; Ribergaard, 2007; Sutherland and Pickart, 2008), carried by the East and West Greenland Currents, overlies the AW layer. The properties of the water masses can change on various time scales from intra-seasonal to interannual or longer-term, reflecting the variabilities on much larger spatial scales. Near the surface of proglacial fjords, significantly warm, fresh and hence low density SW prevails, with properties that are strongly affected by solar insolation, subglacial discharge, and iceberg and sea ice melts (Chauché et al., 2014; Mortensen et al., 2011). Therefore, fjord stratification, determined by fjord water properties and density, vary temporarily to reflect the amount of freshwater discharge and ambient water conditions. However, the impact of observed fjord stratification difference on the vertical distribution of outflowing plume water remains poorly understood.

To better understand the properties of vertical water mass profiles in a fjord under the influence of subglacial discharge, we performed summer hydrographic and turbidity observations in Bowdoin Fjord (BF) in northwestern Greenland. We used the observational data to estimate the fraction of subglacial discharge in fjord water. Results obtained in 2014 and 2016 were compared with those computed with a subglacial plume model. In the northwestern sector of the Greenland ice sheet, ice mass loss has increased since 2005 (Khan et al., 2010; Kjær et al., 2012). Further changes are expected in the future, but in situ data are relatively sparse, and the detailed fjord water properties and the effect of subglacial discharge are poorly understood in this region. We chose the BF in northwestern Greenland as the study area because of its proximity to a village as well as field observations conducted on glaciers and the ocean in the area (Kanna et al., 2018; Sugiyama et al., 2015). Such previous and ongoing studies in the region provided the impetus to conduct the study reported in this paper.

The focus of our measurements in BF was to reveal fjord water properties and the differences in properties of vertical water mass profiles in 2014 and 2016. The aim of the study is to determine the factors controlling changes in the water properties of a proglacial fjord. This study is structured as follows. We introduce the target area as the BF in northwestern Greenland (Sect. 2). We explain the details of conductivity–temperature–depth (CTD)/turbidity observations and freshwater fraction analysis (Sect. 3). We present the differences in fjord water properties and the vertical distribution of outflowing plume water between 2014 and 2016 (Sect. 4). Next, we perform the numerical experiments to interpret the observed difference in vertical distribution of plume water (Sect. 5). Finally, we compare the observational data with model results to interpret the mechanism

controlling the differences in the fjord water properties (Sect. 6).

## 2 Study area

This study focuses on BF (77.6° N, 66.8° W; 3–5 km wide and 20 km long), one of the arms of Inglefield Bredning (IB; 10–15 km wide and 100 km long) in northwestern Greenland (Fig. 1). In IB, sea ice covers the ocean between October and May. In June and July, the sea ice melts rapidly exposing open ocean surface. During the summer melt season, areas of highly turbid ocean surface water form near the ice sheet and glaciers as a result of glacial meltwater discharge (Ohashi et al., 2016).

The bathymetry of BF was surveyed with an echo sounder along the centerline and several profiles across the fjord (Sugiyama et al., 2015). The water depth is about 600 m at the mouth of BF, shoaling to about 210 m at the ice front of the Bowdoin Glacier (BG). Hence, it is assumed that subglacial discharge takes place at a depth of 210 m below sea level, which corresponds to the depth between warm AW and cold PW cores. Water properties at this depth are expected to change according to the relative influence of AW and PW. Therefore, BF is suitable for assessing the impact of the change in water properties on the vertical distribution of outflowing plume water.

To help estimate the subglacial discharge conditions for BG, we used Regional Atmospheric Climate Model (RACMO) 2.3p2 runoff data downscaled to 1 km (Noël et al., 2016; Noël et al., 2018). The catchment of the glacier was determined from the Greenland Ice Mapping Project digital elevation model (Howat et al., 2014). In summer (June–August), the daily mean amount of subglacial discharge estimated from the RACMO data varied greatly ( $19 \pm 16 \text{ m}^3 \text{ s}^{-1}$  in 2014 and  $21 \pm 18 \text{ m}^3 \text{ s}^{-1}$  in 2016). Using the daily mean values of the five days prior to the observation dates (Mankoff et al., 2016), we perform numerical experiments (see Sect. 5 for details). The daily mean amount of subglacial discharge over five days in 2016 ( $45 \text{ m}^3 \text{ s}^{-1}$ ) was estimated to be 25 % greater than that in 2014 ( $36 \text{ m}^3 \text{ s}^{-1}$ ). To help estimate the subglacial discharge conditions, air temperature data taken at Qaanaaq Airport located 30 km southwest of the BG were used (77.47° N, 69.23° W, 16 m a.s.l.; blue circle in Fig. 1a). Spring–summer air temperature was generally warmer in 2016 than in 2014. The amount of subglacial discharge is controlled by the amount of surface melt, which is commonly estimated as the sum of the positive degree days (PDD) (e.g., Cuffey and Paterson, 2010). The PDD at Qaanaaq Airport was approximately 20 % greater in 2016 than in 2014, suggesting a greater subglacial discharge in 2016. In addition, this PDD difference means that at least 20 % difference in the amount of discharge between two observations could occur, assuming that the amount of subglacial discharge increases at a constant rate during the summer melt season.

## 3 Observational data and methods

### 3.1 Hydrographic observation

We performed CTD observations in BF in the summers of 2014 and 2016. The observations were performed along the centerline of the fjord at six locations each year; at Stations 14D1–6 on 4 August 2014, and at Stations 16D1–6 on 29 July 2016 (where the first two digits in the station label denote the year; Fig. 1b). Station 16D6 was located in IB, approximately 4 km from the mouth of BF. A CTD profiler (RINKO Profiler ASTD-102, JFE Advantech) was lowered from a boat to measure the temperature, salinity, and turbidity profiles from the surface to the bottom of the fjord (see Kanna et al., 2018 for details). The precision of the depth, temperature, salinity, and turbidity measurements were 1.8 m, 0.01 °C, 0.01 psu, and 0.3 formazin turbidity units (FTU), respectively.

We collected 33 water samples at Stations 16D2–6 to calibrate the salinity measurements. Water sampling was performed at depths deeper than 10 m to avoid the influence of the steep salinity gradient near the surface. The salinities of the water samples were measured using a salinometer (Guideline Autosal 8400B) to correct the in situ measurements based on the CTD. The uncertainty in salinity ( $\sim 0.01 \text{ psu}$ ) made it difficult to compare its absolute value, but the vertical gradient of salinity should be valid.



### 3.2 Freshwater fraction analysis

In proglacial fjords, seawater is influenced by freshwaters from subglacial meltwater discharge (subglacial discharge) and submarine melting of the ice front (submarine meltwater). A potential temperature–salinity ( $\theta$ - $S$ ) diagram can be used to separate the mixing processes of these waters (see also Appendix A).

5 Subglacial discharge mixes with the ambient ocean water to form an upwelling plume, which subsequently **spreads due to entrainment**. The straight line on the  $\theta$ - $S$  diagram between the subglacial discharge ( $\theta = \theta_{sg} = -0.15$  °C; **pressure dependent freezing point at 210 m depth**,  $S = S_{sg} = 0$  **psu**) and ambient ocean water at the conduit depth ( $\theta = \theta_e$ ,  $S = S_e$ ; potential temperature and salinity at the 210 m depth averaged for all observation sites in each year; hereinafter referred to as “entrained fjord water”) is called the runoff line (Straneo et al., 2011, 2012).

10 At the ice front, submarine melting of ice is driven by the heat of ambient seawater. The straight line on the  $\theta$ - $S$  diagram that indicates the mixing caused by submarine melting is called the melt line (Straneo et al., 2011, 2012). We defined the effective potential temperature ( $\theta_{mw}$ : °C) by calculating the energy required to melt ice when  $S = 0$  **psu** (Chauché et al., 2014; Gade, 1979; Jenkins, 1999; Straneo et al., 2012):

$$\theta_{mw} = \theta_f - \frac{L_f}{c_p} - \frac{c_i(\theta_f - \theta_i)}{c_p} \quad (^\circ\text{C}), \quad (1)$$

15 where  $\theta_f$  is the pressure-corrected melting point of ice ( $-0.1$  °C),  $L_f$  is the latent heat of fusion ( $334.5$  kJ kg<sup>-1</sup>),  $\theta_i$  is ice temperature ( $-5$  °C; Seguinot et al., 2016), and  $c_i$  and  $c_p$  are the specific heat capacities of ice and seawater ( $2.1$  and  $3.98$  kJ kg<sup>-1</sup> K<sup>-1</sup>). Thus, the melt line is the line connecting the submarine meltwater ( $\theta = \theta_{mw}$ ,  $S = S_{mw} = 0$  **psu**) and the entrained fjord water.

In this study, the  $\theta$ - $S$  data of entrained fjord water were located between the AW and the PW cores, suggesting that the water property was influenced by the mixing of AW and PW. Moreover, the characteristics of AW core differed between 2014 and 2016. Hence, the entrained fjord water property used in this study differed between 2014 and 2016. This entrained fjord water is not necessarily the sole **source** of submarine meltwater. However, since the observed temperature has a similar structure at the depths where the submarine melt is in effect, we selected the entrained fjord water as the representative **source** of submarine meltwater fraction (see Sects. 4.2 and 6.3 for details). Note that the estimation of the subglacial discharge fraction is little affected by the above setting of the **source** due to the  $\theta$ - $S$  inclination proximity to the melt line.

Assuming that the water properties can be described as a mixture of the three different water masses (subglacial discharge, submarine meltwater, and entrained fjord water), the fraction of each water component in seawater can be calculated (Appendix A; e.g., Everett et al., 2019; Mankoff et al., 2016; Mortensen et al., 2013). In the  $\theta$ - $S$  space consisting of the positive fraction of each component (hereinafter referred to as the “meltwater quadrant”), the water mass properties can be explained as a mixture of the three components. Note that water mass properties outside the meltwater quadrant are affected by other mixing processes, and the calculation mentioned above is not applicable.

## 4 Observational results

### 4.1 Water properties

35 From the bottom to the surface, layers of warm, saline AW (its core represented by potential temperature maximum;  $\theta_{max}$ ), cold PW (its core represented by the potential temperature minimum;  $\theta_{min}$ ), and significantly warm, fresh SW were observed in 2014 and 2016 (Fig. 2). In 2016, the  $\theta$ - $S$  property was similar at depths deeper than the PW core inside and outside BF. However, at depths shallower than the PW core, the  $\theta$ - $S$  properties differed. Outside BF, temperature monotonically increased from the PW core toward the surface, suggesting the development of a seasonal pycnocline. Inside BF, temperature increased upwards but then decreased at about 40 m. This difference was suggestive of local characteristics of the fjord water structure. Between 2014 and 2016, there were several differences in water properties, especially in temperature. The vertical distributions of the potential temperature, salinity, and turbidity and their differences are described in the subsequent sections.

### 4.1.1 Potential temperature

The vertical structures of temperature were notably different between 2014 and 2016. The AW core was warmer and shallower in 2014 (1.3 °C at ~290 m) than in 2016 (1.0 °C at ~320 m; Figs. 3a–3d). At the deepest part of the fjord, the warm layer (> 0 °C) was thicker in 2014. Moreover, the depth of the PW core was shallower in 2014 with a temperature of –0.8 °C in both observations. Because of the differences in the AW core temperature and warm layer thickness, the temperature near the BG drainage conduit (210 m) was up to 0.9 °C warmer in 2014 (Fig. 3e).

At depths shallower than 150–170 m (i.e., PW core), the temperature structure differed significantly between the two observations. In 2014, a relatively cold temperature maximum (–0.7 °C; hereinafter referred to as “local  $\theta_{\max}^{2014}$ ”) was found at a depth of 100 m (Figs. 2, 3a, and 3b). Moreover, the coldest water (–1.0 °C; hereinafter referred to as “local  $\theta_{\min}$ ”) was observed at a depth of 80 m (Figs. 2, 3a, and 3b), and the temperature at the local  $\theta_{\min}$  was even colder than that at the PW core. In 2016, a corresponding local  $\theta_{\min}$  was not observed, but a clear temperature maximum (0.2 °C; hereinafter referred to as “local  $\theta_{\max}^{2016}$ ”) was found at a depth of 60 m and the temperature of the local  $\theta_{\max}^{2016}$  was significantly warmer than that of the local  $\theta_{\max}^{2014}$  (Figs. 2, 3c, and 3d). Because the increase in temperature from the PW core to the local  $\theta_{\max}^{2016}$  in BF was roughly the same as that outside BF, the water properties below the local  $\theta_{\max}^{2016}$  layer in the fjord could represent a seasonal pycnocline over a wider area. In addition, the difference between local  $\theta_{\max}^{2016}$  and local  $\theta_{\max}^{2014}$  suggested that more enhanced seasonal pycnocline was developed in 2016 than in 2014.

At depths shallower than 20 m, the water temperature increased rapidly toward the surface in both 2014 and 2016. However, the temperatures were up to 2.3 °C colder in 2016 than in 2014 at depths of 5–20 m (Figs. 3e and 3f).

### 4.1.2 Salinity, potential density, and stratification

Salinity varied vertically between 2014 and 2016. At depths below 210 m, including the AW core, salinity was roughly the same between the two observations (Figs. 4a–4d), although the salinity at the AW core differed (2014: 34.2 psu, 2016: 34.3 psu). At a depth of 5–170 m (shallower than the PW core), salinity was higher in 2016 than in 2014, including the salinity at the PW core (2014: 33.5 psu, 2016: 33.7 psu) (Figs. 4e and 4f). This difference was more significant (0.6–1.6 psu) near the surface (5–20 m). In contrast, salinity at the surface (0–5 m) was lower in 2016 except at the outer portion of BF.

The vertical distribution of the potential density was mainly controlled by salinity; therefore, the differences in the potential density between 2014 and 2016 were mostly the same as those of salinity (not shown). At a depth of 5–170 m, the potential density was higher in 2016 than in 2014, while at the surface it was lower in 2016.

Behavior of subglacial discharge is affected by salinity and density profiles. The square of the Brunt-Väisälä frequency ( $N^2$ ) increased toward the surface in both observations. In particular,  $N^2$  was the greatest (> 0.001 s<sup>–2</sup>) at depths shallower than 10–15 m, representing the strongest stratification among all depths (Figs. 5a–5d).  $N^2$  was higher in 2016 than in 2014 at depths shallower than 10 m, but lower by up to 0.0007 s<sup>–2</sup> at depths of 10–50 m (Figs. 5e and 5f). Thus, the stratification in 2016 was stronger near the surface (0–10 m) than in 2014 but weaker at the subsurface (10–50 m).

### 4.1.3 Turbidity

Turbidity acts as an effective tracer of subglacial discharge. The highest turbidity layer (> 4 FTU) was found not at the surface, but at the subsurface at 15–50 m in 2014 and 10–40 m in 2016 (Figs. 6a–d). Turbidity decreased from the subsurface to a depth of about 100 m, and reached almost zero at depths below 150 m. In addition, turbidity decreased with distance from the ice front toward the mouth of the fjord, in contrast to temperature and salinity, which changed little horizontally.

The distribution in turbidity differed between the two observations. In 2014, a low turbidity layer existed further offshore at a depth of around 10 m, which was sandwiched by higher turbidities above and below (Figs. 6a and 6b). Conversely, in 2016, turbidity was nearly homogeneous at the depth range of 0–15 m, and there was no discontinuity at a depth of 10 m (Figs. 6c and 6d). Therefore, turbidity at a depth of 0–15 m was 1–2 FTU higher in 2016 than in 2014 (Figs. 6e and 6f). Meanwhile, at

the depth of 40–150 m within 5 km of the ice front in 2014, turbidity was relatively high ( $> 1$  FTU). In 2016, no relatively high turbidity layer existed at depths below around 60 m. Therefore, turbidity at a depth of 15–200 m within 5 km of the ice front was lower in 2016 than in 2014. This difference was particularly significant (up to 1.5–5 FTU) at depths of 20–120 m. These differences in turbidity could be attributed to the fraction of subglacial discharge, as will be discussed in Sect. 4.2.

5

#### 4.2 Freshwater fraction in $\theta$ - $S$ diagram and the role of subglacial discharge

As shown in Sect. 4.1, there were some differences in the vertical distribution of the  $\theta$ - $S$  properties between 2014 and 2016. To understand the differences in the mixing processes controlling the water properties, we estimated the freshwater fractions in the  $\theta$ - $S$  diagram (see Sect. 3.2 for details). We compared a common site nearest the ice front (Stations 14D1 and 16D3; approximately 4 km from the ice front) and examined the difference in the freshwater fractions. The results were similar for the other stations.

First, we examined the properties of the entrained fjord water at the 210 m depth. The  $\theta$ - $S$  properties obtained in 2014 were closer to those of the AW core than the PW core (Figs. 7a and 7c), whereas they were more similar to the PW core (Figs. 7b and 7d). This difference implies greater influence of AW at the 210 m depth in 2014.

At depths from 210 m to the PW core ( $\sim 150$  m), the  $\theta$ - $S$  properties in 2014 showed a similar tendency as those in 2016. In both 2014 and 2016, near the PW core, the  $\theta$ - $S$  properties deviated slightly from the melt line and were located outside the meltwater quadrant, implying the influence of PW.

The  $\theta$ - $S$  properties above the PW core (80–150 m) differed between 2014 and 2016. The  $\theta$ - $S$  properties in 2014 deviated slightly toward a high temperature from the PW core to the local  $\theta_{\max}^{2014}$  ( $\sim 100$  m). This deviation might reflect a slightly developed seasonal pycnocline. From the local  $\theta_{\max}^{2014}$  ( $\sim 100$  m) to the local  $\theta_{\min}$  ( $\sim 80$  m), the  $\theta$ - $S$  properties aligned perfectly along the melt line (solid black lines in Figs. 7a and 7c). The submarine meltwater fraction at the local  $\theta_{\min}$  was estimated to be 1.6 %, which was the largest fraction, indicating the greatest influence of submarine melting among all depths (Fig. 7c). The estimated submarine meltwater fraction at the local  $\theta_{\min}$  increased to 2.1 % and 2.5 % in the case that the source of entrained fjord water was set to the water at the depth of 250 m and 300 m, respectively. Meanwhile, the subglacial discharge fraction was not significant. By contrast, in 2016, the  $\theta$ - $S$  properties were indicative of a seasonal pycnocline above the PW core, and the submarine meltwater fraction decreased to less than 0.5 % (Fig. 7d). The estimated fraction increased to 1.1 % and 1.8 % in the case that the source of entrained fjord water was set to the water at the depth of 250 m and 300 m, respectively, but the submarine meltwater fraction was by far smaller than those in 2014. On the other hand, the subglacial discharge fraction was estimated to be 1.1 %.

At depths of 50–80 m, above the local  $\theta_{\min}$  in 2014, the seawater consisted of 1.3–1.6 % submarine meltwater, 0.1–1.4 % subglacial discharge, and 97.3–98.3 % entrained fjord water (Fig. 7c and blue lines in Fig. 8). This mixture reflected the substantial influence of submarine meltwater in this layer. In 2016, the  $\theta$ - $S$  data were located outside the meltwater quadrant, implying that the ocean water properties could not be explained by the simple mixing of the three water components (Figs. 7b and 7d). Near the local  $\theta_{\max}^{2016}$  approximately 60 m, turbidity was significantly lower in 2016 than in 2014, implying a weaker influence of subglacial discharge.

Further upward, we focused on the subsurface at a depth of 15–40 m where the highest turbidity was observed. The subglacial discharge fraction was high, with a maximum around 15 m (Figs. 7c and 7d). In 2014, the seawater consisted of 2.5–6.0 % subglacial discharge, 0.4–1.1 % submarine meltwater, and 93.6–96.3 % entrained fjord water (Fig. 7c and blue lines in Fig. 8). Although the submarine meltwater fraction decreased closer to 15 m, the rapid increase in temperature in the  $\theta$ - $S$  diagram might reflect the influence of the development of a seasonal pycnocline. In 2016, the seawater was composed of approximately 2.4–4.0 % subglacial discharge and 96.0–97.6 % entrained fjord water, with no submarine meltwater (Fig. 7d and red lines in Fig. 8). The subglacial discharge fraction was up to 2.0 % greater in 2014 than in 2016.

Near the surface (depth: 5–15 m) immediately above the most turbid water layer, the  $\theta$ - $S$  properties were outside the meltwater quadrant in both observations. The  $\theta$ - $S$  properties in 2014 deviated toward a significantly high temperature and low salinity above the runoff line (Figs. 7a and 7c). The  $\theta$ - $S$  properties in 2016 showed a similar tendency to 2014, but the deviation from the runoff line was smaller (Figs. 7b and 7d). Therefore, water might have been influenced by subglacial discharge more strongly in 2016 than in 2014, although it was difficult to quantify, because this layer was outside the meltwater quadrant. Turbidity at this depth was also higher in 2016 than in 2014, supporting the greater influence of subglacial discharge in 2016.

## 5. Numerical experiments

### 5.1 Experimental settings

To interpret the observed differences in the vertical distribution of outflowing plume water between 2014 and 2016, we perform a set of numerical model experiments. The model simulates a transient behavior of the subglacial discharge plume in front of the BG (Fig. 9). We use a three-dimensional non-hydrostatic ocean model with the Boussinesq approximation, originally developed by Matsumura and Hasumi (2008). The model domain represents BF and is 3.2 km wide (from east to west;  $x$ -direction), 20.5 km long (from north to south;  $y$ -direction), and 600 m deep ( $z$ -direction) (Figs. 9a and 9b). The ice front is located at the northern end and the fjord mouth at the southern end. We simplify the measured bathymetry of the BF (Sugiyama et al., 2015; Figs. 9a and 9b) to set a model geometry. A subglacial drainage conduit is approximated by a rectangular channel (40 m wide  $\times$  10 m high) at the base (210 m deep) in the center of the glacier front. The model resolution is 20 m horizontally and 5 m vertically. The horizontal subgrid-scale viscosity and diffusion are represented by the strain rate-dependent Smagorinsky model (Smagorinsky, 1963) following Matsumura and Hasumi (2010). The vertical viscosity and diffusivity coefficient are set to  $1.0 \times 10^{-5} \text{ m}^2 \text{ s}^{-1}$ . The Coriolis parameter is set to  $1.4 \times 10^{-4} \text{ s}^{-1}$ .

The initial potential temperature and salinity are set to be horizontally uniform using the observation data in 2014 (solid lines in Figs. 9c and 9d). Subglacial discharge ( $\theta = -0.15 \text{ }^\circ\text{C}$ ; pressure dependent freezing point at 210 m depth,  $S = 0$  psu) is injected into the model domain from the subglacial drainage conduit at the northern boundary. The velocity profile at the southern boundary is predicted to compensate for the discharge inflow so that the total water volume is conserved in the model domain. A virtual tracer, that is assumed to obey the same advection–diffusion equation as potential temperature and salinity, is implemented to track the behavior of subglacial discharge. The tracer concentration is initially zero over the whole domain and exhibits unity for the subglacial discharge. No heat flux and wind stress are applied at the surface. Quadratic drag bottom condition is used for the seafloor, where the non-dimensional drag coefficient is set to  $2.5 \times 10^{-3}$ . ~~No-slip conditions are used for the seafloor.~~ We restore  $\theta$  and  $S$  to the initial profile at the southern boundary. The model is integrated for seven days from a state of rest, which is sufficient time for the subglacial discharge tracer to reach the southern boundary. Note that the numerical experiment results represent the transitional process of the subglacial discharge tracer, and are not applicable to long-term behavior of subglacial plume. Thus, we do not discuss the response of the fjord stratification to the water mass transformation due to plume entrainment on the timescales of months.

As the control case, we perform the experiment given by inflow velocity at the northern boundary ( $V_{\text{sg}}$ ) of  $0.09 \text{ m s}^{-1}$ , corresponding to the subglacial discharge ( $Q_{\text{sg}}$ ) of  $36 \text{ m}^3 \text{ s}^{-1}$  (estimated from the RACMO data in Sect. 2) (hereinafter referred to as CTRL; Tab. 1). To investigate the effect of the amount of subglacial discharge, the experiments are conducted by changing the inflow velocity by a factor of ten ( $V_{\text{sg}} = 0.025, 0.1125, \text{ and } 0.25 \text{ m s}^{-1}$ ;  $Q_{\text{sg}} = 10, 45, \text{ and } 100 \text{ m}^3 \text{ s}^{-1}$ ; hereinafter referred to as Q10, Q45, and Q100, respectively). We also perform the experiments with the same subglacial discharge as the CTRL and Q45 but with the initial stratification as observed in 2016 to assess the influence of the stratification difference (hereinafter referred to as ST16 and ST16Q45, respectively; dashed lines in Figs. 9c and 9d).

Although we have implemented the effect of submarine melting following Holland and Jenkins (1999) and Losch (2008), the amount of resultant meltwater is less than 0.05 % of the imposed subglacial discharge. Hence, the effect of submarine melting is negligible on the time scale considered with the present model settings.

## 5.2 Experimental results

Numerical experiments are performed to investigate the impact of the 25 % greater discharge (Q45), fjord stratification (ST16), and their combined impact (ST16Q45) as compared to the most realistic case (CTRL; see Appendix B for details). When comparing the results of CTRL with those of Q45, ST16, and ST16Q45, the results after 41 h are used to consider the integration time required for the virtual tracer to reach the southern boundary in the earliest case. A comparison of the CTRL and ST16Q45 results is shown in Appendix C.

In Q45, the subglacial discharge tracer concentration at a depth of 0–50 m is 10–60 % greater than that in CTRL (Figs. 10a and 10c). In addition, the tracer concentration shows a decrease of 10–40 % at deeper depths of 50–80 m only in the vicinity of the glacier front. This indicates that subglacial discharge plume shifts to the shallower layer as the amount of discharge increases.

In ST16, the concentration of subglacial discharge tracer at a depth of 0–25 m is up to 60 % greater than that in CTRL, except at a depth of 5–15 m in the vicinity of the glacier front (Figs. 10b and 10d). In particular, at a depth of 0–5 m, tracer concentration rate of increase is high. At depths below 25 m, the tracer concentration decreases by up to 50 %. The stratification in ST16 in the subsurface layer is weaker than that in CTRL. Weaker stratification favors stronger upwelling. The plume in ST16 is likely to spread near the surface in higher concentrations than that in CTRL.

## 6 Discussion

### 6.1 Quantitative relationship between the subglacial discharge fraction and turbidity

In Sect. 4.2, high turbidity corresponded to a high fraction of subglacial discharge. Therefore, we assessed the quantitative relationship between turbidity and subglacial discharge fraction in both study years (Fig. 11). In 2014, the relationship between the subglacial discharge fraction ( $R_{sg}$ : %) and turbidity ( $TUR$ : FTU) in the meltwater quadrant was expressed as  $R_{sg} = TUR \times 0.7 - 2.0$  ( $R^2 = 0.67$ ; Fig. 11a). In 2016, the data in the meltwater quadrant and that including the data points close to the runoff line (depth: 15–40 m) showed a linear relationship of  $R_{sg} = TUR \times 0.6 + 0.3$  ( $R^2 = 0.94$ ), with a roughly similar inclination to that in 2014 (Fig. 11b). Moreover, the low turbidity at the local  $\theta_{max}^{2016}$  (depth: 60 m) in 2016 was consistent with the calculation that the fraction of subglacial discharge is small in this layer (Figs. 7b and 7d). These results indicate that the vertical distribution of turbidity reflects the mixing ratio of subglacial discharge near the ice front (Fig. 6).

Recent observations in other regions of Greenland have qualitatively shown that the high turbidity subsurface layer corresponds to the vertical distribution of outflowing plume water (Chauché et al., 2014; Stevens et al., 2016). The quantitative relationship between turbidity and the subglacial discharge fraction presented in this study reveals that measuring turbidity is an effective tool to investigate the vertical distribution of outflowing plume water into fjords. At the fjord surface, the quantitative relationship between turbidity and the subglacial discharge fraction was not investigated in this study. However, because the turbidity distribution at the fjord surface can be visually captured by satellites (Chu et al., 2012) and drones, it is easier to monitor the distribution of turbidity than to investigate the subglacial discharge fraction based on in situ observations. This emphasizes the importance of turbidity measurements to better understand the subglacial plume behavior. It should be noted that turbidity at the fjord surface is only a reasonable proxy if turbid subglacial discharge plume is able to reach the surface, which depends on the degree of entrainment.

### 6.2 Factors controlling the observed vertical distribution of outflowing plume water

As shown in Sect. 4.2, the estimated subglacial discharge fraction differed between 2014 and 2016. A likely interpretation of this difference is the amount of subglacial discharge and fjord stratification in each observation. To test this hypothesis, we compare the numerical model results with the observational data. It should be noted that the observational data represent snapshots in summer, and not the entire melt seasons. Thus, we discuss only the difference in the short-term transitional process of outflowing plume water.

Numerical experiments are performed to investigate the impacts of a 20 % greater discharge (Q600) and fjord stratification difference (ST16) as compared to the most realistic case (CTRL; see Appendix B for details) (Fig. 11). The 20 % greater amount of discharge was assumed in Q600 based on 20% increase in PDD at Qaanaaq Airport from 2014 to 2016 (see Sect. 2). When comparing the results of CTRL with those of Q600 and ST16, the results after 15 h are used to consider the integration time required for the virtual tracer to reach the southern boundary in the earliest case (16 h in CTRL, 15 h in Q600, and 15 h in ST16).

Near the fjord surface (depth: 5–15 m), turbidity was higher in 2016 than in 2014 (Figs. 6e and 6f). In Q45, the concentration of subglacial discharge tracer near the surface (depth: 5–15 m) increased by about 30 % from that in CTRL (Figs. 10a and 10c). The observation and model were consistent with the assumption that the subglacial discharge in 2016 was greater, as estimated from the RACMO data. These results suggest that turbid subglacial plume extended near the fjord surface more in 2016 because of a stronger buoyancy forcing exerted by the 25 % greater discharge. Previous studies have also suggested that a subglacial plume driven by a greater discharge has a stronger buoyancy forcing, leading to both faster entrainment of ambient water and an increase in the fraction of subglacial discharge (Jenkins, 2011; Straneo and Cenedese, 2015). Chauché et al. (2014) compared the  $\theta$ - $S$  properties of fjord water with the amount of subglacial discharge based on a glacier surface melt estimation using a PDD/melt-rate model (Box, 2013). Comparison of results in CTRL and Q45 showed that a 25 % change in the subglacial discharge caused an approximately 30 % change in the subglacial discharge fraction near the surface. In ST16, the tracer concentration increased in large portion of 5–15 m from that in CTRL (Figs. 10b and 10d). Although the increase at 5–15 m favored the observed change, the mean increase in the tracer concentration was smaller than that of the increase in discharge. Therefore, the vertical distribution of outflowing plume water near the surface could be affected more by a change in the amount of subglacial discharge than the difference in the observed fjord surface stratification.

~~When the amount of subglacial discharge is large, highly turbid glacial meltwater is expected to spread over a larger surface area. This is consistent with remote sensing data analyses performed off the coast of northwestern Greenland where a number of glaciers terminate in the ocean (Ohashi et al., 2016).~~ Furthermore, a 25 % increase in the subglacial discharge results in a greater tracer concentration not only at the surface but also at the subsurface (depth: 15–40 m). The magnitude of the change was similar between the surface and subsurface layers (a few tens of percent) (Figs. 10a and 10c). This implies the need to consider the vertical distribution of outflowing plume water at the subsurface in addition to the drone surface measurement to quantitatively assess the overall impact of subglacial discharge.

In contrast to the observations near the surface, the fraction of turbid subglacial discharge at the subsurface (15–40 m) was greater in 2014 than in 2016 (Figs. 6, 7, and 8a). This field observation was inconsistent with the numerical experiments of the differences in discharge, showing a smaller concentration of subglacial discharge tracer at the subsurface under a smaller amount of discharge (Figs. 10a and 10c). From the stratification change experiment, the tracer concentration at 25–40 m was about 20 % greater in CTRL than in ST16 (Figs. 10b and 10d). Although the decrease in the shallow portion of subsurface did not favor the observed change, this was consistent with the observed difference at the subsurface, and the rate of change was quantitatively consistent (a few tens of percent). Thus, in comparison of the change in the amount of subglacial discharge, variations in stratification are a likely explanation for the observed differences in the subglacial discharge fraction at the subsurface.

Previous studies have shown that strong subsurface stratification in fjords prohibits upwelling of the subglacial discharge plume and results in the dispersion of plume into a subsurface layer (Carroll et al., 2015). Furthermore, plumes extend further over the surface under weaker stratification (Carroll et al., 2015). The stratification in ST16 in the subsurface layer is weaker than that in CTRL, whereas that near the surface is stronger. In the case of when the plume reached the fjord surface, our model suggested that strong surface stratification would prohibit the subduction of the outcropped plume, likely resulting in a plume that extends to the fjord surface.

### 6.3 Difference in the formation process of stratified structures

Subsurface stratification influences the vertical distribution of outflowing plume water. The fjord stratification in 2014 and in 2016 differed at a depth of approximately 60–80 m which was attributed to the influence of submarine melting and the broad seasonal pycnocline. In this section, we discuss the formation process of the stratified structures in each observation.

5 In 2014, a warm layer strongly affected by AW was in contact with the ice front, which could enhance the fraction of submarine meltwater around a depth of 80 m (Figs. 2, 3, 7a, 7c, and 8b). Because the submarine meltwater fraction was detected regardless of the distance from the ice front of the BG, submarine meltwater from other glaciers in IB might have influenced the water in BF. Moreover, this horizontal distribution of the submarine meltwater suggests that the submarine melt does not take place only at the subglacial conduit depth. However, the relationship that temperature at the deep part of fjord is generally warmer in 2014 and the relatively warmer source temperature of entrained fjord water in 2014 should be robust (Figs. 3 and 7). A warm layer above 210 m extended further up to the shallower layer in 2014 than in 2016. The available excess heat of up to 0.9 °C was 1.6 times greater in 2014 than in 2016 when calculated by the difference from the freezing temperature (Figs. 3 and 7). A previous model study found that the rate of submarine melting increased proportionally to the increase in water temperature to the power of 1.3–1.6 (Xu et al., 2013). Porter et al. (2014) revealed that the rates of ice mass loss at the Tracy and Heilprin Glaciers, neighboring tidewater glaciers in IB, differed substantially between 1.63 and 0.53 Gt a<sup>-1</sup>. Since the water depth at the ice front of the Tracy Glacier (610 m) is deeper than that of the Heilprin Glacier (350 m), the ice front has wider contact with warm AW, suggesting a greater glacier mass loss associated with the greater submarine melting (Porter et al., 2014). Our study suggests that the difference in the structure of deep heat storage can alter the development of submarine melting layer and affects ice mass loss from Greenland glaciers.

20 In 2016, a simple, but broad seasonal pycnocline was detected outside BF (Figs. 2, 3, 7b, and 7d). In the study area (Qaanaaq Airport; 77.47° N, 69.23° W, 16 m a.s.l.; blue circle in Fig. 1a), the mean temperature during the previous winter (December–February) was 1.1 °C lower in 2016 than in 2014. Thus, winter vertical mixing of the fjord was enhanced and the mixed layer depth could deepen during the preceding winter in 2016. In summer, a seasonal pycnocline could develop above the remnant of the winter mixed layer. In addition, the PW core in BF was deeper in 2016, supporting the possibility of the development of a seasonal pycnocline influenced by the enhancement of the winter vertical mixing. We speculate that the development of the seasonal pycnocline over a broader area in 2016 is due to the enhancement of winter vertical mixing.

At depths shallower than 60–80 m, where subglacial discharge spreads, fjord stratification could be modified by subglacial discharge. Fjord stratification is expected to be stronger after subglacial discharge that exits near the surface as in this study, because subglacial discharge would lighten the surface layers. However, this study revealed the transitional processes of subglacial discharge plume over a relatively short time scale. To fully understand the longer-term interactions of subglacial discharge and fjord stratification (e.g., seasonal and interannual variations), we need to perform long-term oceanic observations and numerical experiments to capture the realistic nature of discharge and submarine melting over a much broader model domain.

### 35 7 Conclusions

With a focus on the differences in the vertical distribution of outflowing plume water and ambient water properties, we investigated the properties of vertical water mass profiles in BF in northwestern Greenland. The differences in the subglacial discharge fraction and water mass properties between 2014 and 2016 are summarized in Fig. 12.

40 The depths of the temperature minimum and maximum differed between the two observations. The  $\theta_{\max}$  (AW core) and the  $\theta_{\min}$  (PW core) were shallower in 2014 ( $\theta_{\max}$  at ~290 m;  $\theta_{\min}$  at ~150 m) than in 2016 ( $\theta_{\max}$  at ~320 m;  $\theta_{\min}$  at ~170 m). The local  $\theta_{\min}$  was observed around 80 m in 2014 but not in 2016. In turn, prominent local  $\theta_{\max}^{2016}$  was detected around 60 m in 2016, which was significantly warmer than the local maximum in 2014. The analysis of the  $\theta$ - $S$  properties indicated that local  $\theta_{\min}$  in 2014 and local  $\theta_{\max}^{2016}$  in 2016 could be influenced by the development of a submarine melting layer and broad seasonal

pycnocline, respectively.

Subglacial discharge plume spread at a depth shallower than local  $\theta_{\min}$  and local  $\theta_{\max}^{2016}$ . In both 2014 and 2016, the fractions of turbid subglacial discharge were highest at the subsurface (15–40 m). The maximum fraction near the ice front was ~6 % in 2014 and ~4 % in 2016. Near the surface (5–15 m), turbidity was higher in 2016 than in 2014, suggesting a stronger influence of turbid subglacial discharge in 2016.

To assess the factors controlling the difference in the observed subglacial discharge fraction, we perform a set of numerical experiments to simulate the subglacial discharge plume under different stratification and volume flux of subglacial discharge. The experiments using the different initial stratifications suggest that the fractional difference in subglacial discharge at the subsurface is likely attributed to the difference in fjord stratification. Moreover, the numerical model results based on a 25 % greater discharge suggest that the difference near the surface is primarily affected by the increase in discharge.

From the surface to the subsurface, where subglacial discharge spread, fjord stratification varied between the study years depending on the layer that developed and the amount of subglacial discharge. At a depth around 60–80 m, fjord stratification could be determined by the influences of submarine melting and seasonal pycnocline. Because of the thicker warm layer strongly affected by AW, a submarine melting layer was able to develop in 2014.

Our study suggests that observed fjord stratification, together with the amount of subglacial discharge, can affect the vertical distribution of outflowing plume water. Given the current increase in meltwater discharge from Greenlandic glaciers, the buoyancy forcing of the subglacial discharge plume and ambient fjord stratification are expected to change. To fully capture the behavior of subglacial discharge plume, further continuous observations and numerical modeling are required over a wider area encompassing northwestern Greenland.

## Appendix A: Freshwater fraction analysis equations

The origins of freshwater in ocean water can be estimated based on a three water mass mixing model. To quantitatively assess the difference in freshwater fractions, we calculated the volume fractions of subglacial discharge ( $f_{sg}$ ), submarine meltwater ( $f_{mw}$ ) and entrained fjord water ( $f_e$ ) from the observed temperature and salinity (Fig. A1). From the mass conservation of  $f_{sg}$ ,  $f_{mw}$ , and  $f_e$ :

$$f_{sg} + f_{mw} + f_e = 1. \quad (\text{A1})$$

The sampled potential temperature ( $\theta_A$ : °C) and salinity ( $S_A$ ) are represented in the following equations:

$$\theta_A = \theta_{sg}f_{sg} + \theta_{mw}f_{mw} + \theta_e f_e \quad (^\circ\text{C}), \quad (\text{A2})$$

$$S_A = S_{sg}f_{sg} + S_{mw}f_{mw} + S_e f_e. \quad (\text{A3})$$

Because  $S_{sg} = 0$  and  $S_{mw} = 0$ , Eq. (A3) is converted into:

$$S_A = S_e f_e. \quad (\text{A4})$$

Using Eqs. (A1), (A2), and (A4),  $f_{sg}$  and  $f_{mw}$  are given as the following respective equations:

$$f_{sg} = \frac{1}{\theta_{sg} - \theta_{mw}} \left( \theta_A - \theta_{mw} \left[ 1 - \frac{S_A}{S_e} \right] - \theta_e \frac{S_A}{S_e} \right), \quad (\text{A5})$$

$$f_{mw} = 1 - f_{sg} - \frac{S_A}{S_e}. \quad (\text{A6})$$

## Appendix B: Validation of the transitional process of subglacial discharge in the numerical experiment

To validate the transitional process of subglacial discharge obtained from the numerical experiment, we compare the numerical model results (CTRL, Q100, and Q10) with observation condition.

In CTRL, the highest tracer concentration is observed at a depth of 0–5 m within several hundreds of meters from the ice front and at a depth of 10–15 m beyond several hundreds of meters from the ice front (Fig. B1a). The distribution roughly coincides with the observed profiles.

In Q100, beyond several hundreds of meters from the ice front, the depth of the highest tracer concentration is observed at



a depth of 10–15 m, approximately the same results as obtained in CTRL (Fig. B1b). However, the region of the highest tracer concentration covers up to  $1.0 \times 10^5 \text{ m}^2$  of the fjord surface (Figs. B1e and B1h), which is not detected at the BG ice front during the two years of observations.

In Q10, the highest concentration of subglacial discharge tracer is observed at a depth of 50–60 m regardless of the distance from the ice front (Fig. B1c). This result is significantly different from those in CTRL and Q100. The results indicate that subglacial discharge plume does not reach the fjord surface, which is inconsistent with the visual observation of turbid surface plumes in front of BG.

In summary, among the three experiments performed under the same initial stratification, the results of CTRL, using the subglacial discharge estimated from RACMO data, are the most consistent with the observed horizontal and vertical distributions of plume water.

### Appendix C: Comparison of results in CTRL and ST16Q45

To investigate the combined impact of the 25 % greater discharge and fjord stratification difference (ST16Q45), a numerical experiment is performed. In ST16Q45, the concentration of subglacial discharge tracer at a depth of 0–30 m is 30–60 % greater than that in CTRL, whereas the tracer concentration decreases by up to 60 % at depths below 30 m (Figs. C1a and C1b). The results are consistent with the observed differences at 5–15 m (near the surface) and 30–40 m (deep portion of the subsurface), except at the depth of 15–30 m. This supports the suggestion that the vertical distribution of outflowing plume water near the surface and at the subsurface can be affected by the differences in the amount of discharge and fjord stratification, respectively (Sect. 6.2).

#### Code availability

The codes to generate the figures and analysis are available from Zenodo (<https://zenodo.org/record/3532803>). The source code for the non-hydrostatic ocean model used in this study is available at <http://lmr.aori.u-tokyo.ac.jp/feog/ymatsu/kinaco.git>.

#### Data availability

Air temperature data are provided by the United States National Oceanic and Atmospheric Administration National Climatic Data Center (<http://www.ncdc.noaa.gov/cdo-web/>). The CTD data and all files used in the numerical experiments are available from Zenodo (<https://zenodo.org/record/3532803>).

#### Author contribution

YO analyzed data, performed simulations, and produced figures. YO and SA prepared the manuscript. YM developed the model code. SS, NK, DS, and YO contributed to the field work. All authors discussed the results and commented on the manuscript.

#### Competing interests

The authors declare that they have no conflict of interest.

#### Acknowledgements

We would like to thank Drs. Y. Fukamachi, T. Sawagaki, J. Saito, I. Asaji, and the members of the 2014 and 2016 field campaigns. Special thanks are extended to S. Daorana, T. Ohshima, and K. Peterson for providing logistical support. We would like to acknowledge Drs. M. R. van den Broeke and B. Noël for providing RACMO data. This research was funded by the Japanese Ministry of Education, Culture, Sports, Science and Technology through the Green Network of Excellence (GRENE) Arctic Climate Change Research Project and the Arctic Challenge for Sustainability (ArCS) Project, and JSPS KAKENHI

## References

- Andersen, M. L., Stenseng, L., Skourup, H., Colgan, W., Khan, S. A., Kristensen, S. S., Andersen, S. B., Box, J. E., Ahlström, A. P., Fettweis, X., and Forsberg, R.: Basin-scale partitioning of Greenland ice sheet mass balance components (2007–2011), *Earth Planet. Sci. Lett.*, 409, 89–95, doi:10.1016/j.epsl.2014.10.015, 2015.
- Arendt, K. E., Dutz, J., Jónasdóttir, S. H., Jung-Mads, S., Mortensen, J., Møller, E. F., and Nielsen, T. G.: Effects of suspended sediments on copepods feeding in a glacial influenced sub-Arctic fjord, *J. Plankt. Res.*, 33, 1526–1537, doi:10.1093/plankt/fbr054, 2011.
- Bartholomaus, T. C., Amundson, J. M., Walter, J. I., O’Neel, S., West, M. E., and Larsen, C. F.: Subglacial discharge at tidewater glaciers revealed by seismic tremor, *Geophys. Res. Lett.*, 42, 6391–6398, doi:10.1002/2015GL064590, 2015.
- Bendtsen, J., Mortensen, J., Lennert, K., and Rysgaard, S.: Heat sources for glacial ice melt in a West Greenland tidewater outlet glacier fjord: The role of subglacial freshwater discharge, *Geophys. Res. Lett.*, 42, 4089–4095, doi:10.1002/2015GL063846, 2015.
- Box, J. E.: Greenland Ice Sheet Mass Balance Reconstruction. Part II: Surface Mass Balance (1840–2010), *J. Climate*, 26, 6974–6989, doi:10.1175/JCLI-D-12-00518.1, 2013.
- Cape, R. M., Straneo F., Beaird N., Bundy, R. M., and Charette, M. A.: Nutrient release to oceans from buoyancy-driven upwelling at Greenland tidewater glaciers, *Nature Geoscience*, 12, 34–39, doi:10.1038/s41561-018-0268-4, 2019.
- Carroll, D., Sutherland, D. A., Shroyer, E. L., Nash, J. D., Catania, G. A., and Stearns, L. A.: Modeling turbulent subglacial meltwater plumes: Implications for fjord-scale buoyancy-driven circulation, *J. Phys. Oceanogr.*, 45(8), 2169–2185 doi:10.1175/JPO-D-15-0033.1, 2015.
- Carroll, D., Sutherland, D. A., Shroyer, E. L., Nash, J. D., Catania, G. A., and Stearns, L. A.: Subglacial discharge-driven renewal of tidewater glacier fjords, *J. Geophys. Res. Oceans*, 122, 6611–6629, doi:10.1002/2017JC012962, 2017.
- Catania, G. A., Stearns, L. A., Sutherland, D. A., Fried, M. J., Bartholomaus, T. C., Morlighem, M., Shroyer, E., and Nash, J.: Geometric Controls on Tidewater Glacier Retreat in Central Western Greenland, *J. Geophys. Res.-Earth Surf.*, 123, 2024–2038, doi:10.1029/2017JF004499, 2018.
- Chauché, N., Hubbard, A., Gascard, J.-C., Box, J., Bates, R., Koppes, M., Sole, A., Christoffersen, P., and Patton, H.: Ice-ocean interaction and calving front morphology at two west Greenland tidewater outlet glaciers, *The Cryosphere*, 8, 1457–1468, doi:10.5194/tc-8-1457-2014, 2014.
- Chu, V.W.: Greenland ice sheet hydrology: a review, *Prog. Phys. Geogr.*, 38(1), 19–54, doi:10.1177/0309133313507075, 2014.
- Chu, V. W., Smith, L. C., Rennermalm, A. K., Forster, R. R., and Box, J. E.: Hydrologic controls on coastal suspended sediment plumes around the Greenland Ice Sheet, *The Cryosphere*, 6, 1–19, doi:10.5194/tc-6-1-2012, 2012.
- Cuffey, K. and Paterson, W. S. B.: *The Physics of Glaciers*, Elsevier, Butterworth Heineman, Burlington, MA, USA, 2010.
- Enderlin, E., Howat, I., Jeong, S., Noh, M., van Angelen, J. H., and van den Broeke, M. R.: An improved mass budget for the Greenland Ice Sheet, *Geophys. Res. Lett.*, 41, 866–872, doi:10.1002/2013GL059010, 2014.
- Everett, A., Kohler, J., Sundfjord A., Kovacs, K. M., Torsvik, T., Pramanik, A., Lars Boehme, L., and Lydersen, C.: Subglacial discharge plume behaviour revealed by CTD-instrumented ringed seals, *Scientific Reports*, 8, 13467, doi:10.1038/s41598-018-31875-8, 2018.
- Fettweis, X., Franco, B., Tedesco, M., van Angelen, J. H., Lenaerts, J. T. M., van den Broeke, M. R., and Galée, H.: Estimating the Greenland Ice Sheet surface mass balance contribution to future sea level rise using the regional atmospheric climate model MAR, *The Cryosphere*, 7, 469–489, doi:10.5194/tc-7-469-2013, 2013a.
- Fettweis, X., Hanna, E., Lang, C., Belleflamme, A., Erpicum, M., and Gall, H.: Brief communication “Important role of the

- ~~mid-tropospheric atmospheric circulation in the recent surface melt increase over the Greenland Ice Sheet?, *The Cryosphere*, 7, 241–248, doi:10.5194/tc-7-241-2013, 2013b.~~
- Gade, H. G.: Melting of ice in sea water: A primitive model with application to the Antarctic ice shelf and icebergs, *J. Phys. Oceanogr.*, 9, 189–198, doi:10.1175/1520-0485(1979)009<0189:MOIISW>2.0.CO;2, 1979.
- 5 Gimbert, F., Tsai, V. C., Amundson, J. M., Bartholomaeus, T. C., and Walter J. I.: Sub-seasonal changes observed in subglacial channel pressure, size, and sediment transport, *Geophys. Res. Lett.*, 43, 3786–3794, doi:10.1002/2016GL068337, 2016.
- ~~Hanna, E., Huybrechts, P., Steffen, K., Cappelen, J., Huff, R., Shuman, C., Irvine Fynn, T., Wise, S., and Griffiths, M.: Increased runoff from melt from the Greenland Ice Sheet: a response to global warming, *J. Climate*, 21(2), 331–341, doi:10.1175/2007JCLI1964.1, 2008.~~
- 10 Holland, D., and Jenkins, A.: Modeling thermodynamic ice–ocean interactions at the base of an ice shelf, *J. Phys. Oceanogr.*, 29, 1787–1800, doi:10.1175/1520-0485(1999)029,1787: MTIOIA.2.0.CO;2, 1999.
- Howat, I. M., Negrete, A., and Smith, B. E.: The Greenland Ice Mapping Project (GIMP) land classification and surface elevation data sets, *The Cryosphere*, 8, 1509–1518, doi:10.5194/tc-8-1509-2014, 2014.
- Jenkins, A.: The impact of melting ice on ocean waters, *J. Phys. Oceanogr.*, 29(9), 2370–2391, doi:10.1175/1520-0485(1999)029<2370:TIOMIO>2.0.CO;2, 1999.
- 15 Jenkins, A.: Convection-driven melting near the grounding lines of ice shelves and tidewater glaciers, *J. Phys. Oceanogr.*, 41(12), 2279–2294, doi:10.1175/JPO-D-11-03.1, 2011.
- Kanna, N., Sugiyama, S., Ohashi, Y., Sakakibara, D., Fukamachi, Y., and Nomura, D.: Upwelling of macronutrients and dissolved inorganic carbon by a subglacial freshwater driven plume in Bowdoin Fjord, northwestern Greenland, *J. Geophys. Res. Biogeosciences*, 123, 1666–1682, doi:10.1029/2017JG004248, 2018.
- 20 Khan, S. A., Wahr, J., Bevis, M., Velicogna, I., and Kendrick, E.: Spread of ice mass loss into northwest Greenland observed by GRACE and GPS, *Geophys. Res. Lett.*, 37, L06501, doi:10.1029/2010GL042460, 2010.
- Kjær, K. H., Khan, S. A., Korsgaard, N. J., Wahr, J., Bamber, J. L., Hurkmans, R., van den Broeke, M., Timm, L. H., Kjeldsen, K. K., and Björk, A. A.: Aerial photographs reveal late–20th-century dynamic ice loss in northwestern Greenland. *Science*, 25 337, 596–573, doi:10.1126/science.1220614, 2012.
- Mankoff, K. D., Straneo, F., Cenedese, C., Das, S. B., Richards, C. G., and Singh, H.: Structure and dynamics of a subglacial discharge plume in a Greenlandic fjord, *J. Geophys. Res. Oceans*, 121(12), 8670–8688, <https://doi.org/10.1002/2016JC011764>, 2016.
- Matsumura, Y. and Hasumi, H.: A non-hydrostatic ocean model with a scalable multigrid Poisson solver, *Ocean Modelling*, 30 24, 15–28, doi:10.1016/j.ocemod.2008.05.001, 2008.
- Matsumura, Y. and Hasumi, H.: Modeling ice shelf water overflow and bottom water formation in the southern Weddell Sea, *J. Geophys. Res.*, 115, C10033, doi:10.1029/2009JC005841, 2010.
- Meire, L., Mortensen, J., Meire, P., Juul-Pedersen, T., Sejr, M. K., Rysgaard, S., Nygaard, R., Huybrechts, F., and Meysman, F. J.: Marine-terminating glaciers sustain high productivity in Greenland fjords, *Glob. Change Biol.*, 00, 1–14, doi:10.1111/gcb.13801, 2017.
- 35 Mortensen, J., Bendtsen, J., Motyka, R. J., Lennert, K., Truffer, M., Fahnestock, M., and Rysgaard, S.: On the seasonal freshwater stratification in the proximity of fast-flowing tidewater outlet glaciers in a sub-Arctic sill fjord, *J. Geophys. Res. Oceans*, 118, 1382–1395, doi:10.1002/jgrc.20134, 2013.
- Mortensen, J., Lennert, K., Bendtsen, J., and Rysgaard, S.: Heat sources for glacial melt in a sub-Arctic fjord (Godthåbsfjord) in contact with the Greenland Ice Sheet, *J. Geophys. Res.*, 116, C01013, doi:10.1029/2010JC006528, 2011.
- Motyka, R. J., Dryer, W. P., Amundson, J., Truffer, M., and Fahnestock, M.: Rapid submarine melting driven by subglacial discharge, *LeConte Glacier, Alaska*, *Geophys. Res. Lett.*, 40, 1–6, doi:10.1002/grl.51011, 2013.
- Motyka, R. J., Truffer, M., Fahnestock, M., Mortensen, J., Rysgaard, S., and Howat, I. M.: Submarine melting of the 1985

- Jakobshavn Isbræ floating tongue and the triggering of the current retreat, *J. Geophys. Res.*, 116, F01007, doi:10.1029/2009JF001632, 2011.
- Myers, P. G., Kulan, N., and Ribergaard, M. H.: Irminger Water variability in the West Greenland Current, *Geophys. Res. Lett.*, 34, L17601, doi:10.1029/2007GL030419, 2007.
- 5 Losch, M.: Modeling ice shelf cavities in a z coordinate ocean general circulation model, *J. Geophys. Res.*, 113, C08043, doi:10.1029/2007JC004368, 2008.
- Lydersen, C., Assmy, P., Falk-Petersen, S., Kohler, J., Kovacs, K. M., Reigstad, M., Steen, H., Strøm, H., Sundfjord, A., Varpe, Ø., Walczowski, W., Weslawski, J. M., and Zajaczkowski, M.: The importance of tidewater glaciers for marine mammals and seabirds in Svalbard, Norway, *J. Mar. Syst.*, 129, 452–471, doi:10.1016/j.jmarsys.2013.09.006, 2014.
- 10 Noël, B., van de Berg, W. J., Machguth, H., Lhermitte, S., Howat, I., Fettweis, X., and van den Broeke, M. R.: A daily, 1 km resolution data set of downscaled Greenland ice sheet surface mass balance (1958–2015), *The Cryosphere*, 10, 2361–2377, doi:10.5194/tc-10-2361-2016, 2016.
- Noël, B., van de Berg, W. J., van Wessem, J. M., van Meijgaard, E., van As, D., Lenaerts, J. T. M., Lhermitte, S., Kuipers Munneke, P., Smeets, C. J. P. P., van Uft, L. H., van de Wal, R. S. W., and van den Broeke, M. R.: Modelling the climate and surface mass balance of polar ice sheets using RACMO2 – Part 1: Greenland (1958–2016), *The Cryosphere*, 12, 811–831, doi:10.5194/tc-12-811-2018, 2018.
- 15 Ohashi, Y., Iida, T., Sugiyama, S., and Aoki, S.: Spatial and temporal variations in high turbidity surface water off the Thule region, northwestern Greenland, *Polar Science*, 10(3), 270–277, doi:10.1016/j.polar.2016.07.003, 2016.
- O’Leary, M. and Christoffersen, P.: Calving on tidewater glaciers amplified by submarine frontal melting, *The Cryosphere*, 7, 119–128, doi:10.5194/tc-7-119-2013, 2013.
- 20 Porter, D. F., Tinto, K. J., Boghosian, A., Cochran, J. R., Bell, R. E., Manizade, S. S., and Sonntag, J. G.: Bathymetric control of tidewater glacier mass loss in northwest Greenland, *Earth Planet. Sci. Lett.*, 401, 40–46, doi:10.1016/j.epsl.2014.05.058, 2014.
- Retamal, L., Bonilla, S., and Vincent, W. F.: Optical gradients and phytoplankton production in the Mackenzie River and the coastal Beaufort Sea, *Polar Biol.*, 31(3), 363–379, doi:10.1007/s00300-007-0365-0, 2008.
- Ribergaard, M. H.: Oceanographic Investigations off West Greenland, Danish Metrological Institute Centre for Ocean and Ice (DMI), Copenhagen, 2007.
- Rignot, E., Fenty, I., Xu, Y., Cai, C., and Kemp, C.: Undercutting of marine-terminating glaciers in West Greenland, *Geophys. Res. Lett.*, 42, 5909–5917, doi:10.1002/2015GL064236, 2015.
- 30 Sasgen, I., Broeke, M. v. d., Bamber, J. L., Rignot, E., Sandberg-Sørensen, L., Wouters, B., Martinec, Z., Velicogna, I., and Simonsen, S. B.: Timing and origin of recent regional ice mass loss in Greenland, *Earth Planet. Sci. Lett.*, 333–334, 293–303, doi:10.1016/j.epsl.2012.03.033, 2012.
- Schrama, E. J. O., Wouters, B., and Rietbroek, R.: A mascon approach to assess ice sheet and glacier mass balances and their uncertainties from GRACE data, *J. Geophys. Res. Solid Earth*, 119, 6048–6066, doi:10.1002/2013JB010923, 2014.
- 35 Sciascia, R., Straneo, F., Cenedese, C., and Heimbach, P.: Seasonal variability of submarine melt rate and circulation in an East Greenland fjord, *J. Geophys. Res. Oceans*, 118(5), 2492–2506, doi:10.1002/jgrc.20142, 2013.
- Seguinot, J., Funk, M., Ryser, C., Jouvét, G., Bauder, A., and Sugiyama, S.: Ice dynamics of Bowdoin tidewater glacier, Northwest Greenland, from borehole measurements and numerical modelling, *Geophys. Res. Abstract*, 18, EGU2016-11604-1, 2016.
- 40 Shepherd, A., Ivins, E. R., Geruo, A., Barletta, V. R., Bentley, M. J., Bettadpur, S., Briggs, K. H., Bromwich, D. H., Forsberg, R., Galin, N., Horwath, M., Jacobs, S., Joughin, I., King, M. A., Lenaerts, J. T. M., Li, J. L., Ligtenberg, S. R. M., Luckman, A., Luthcke, S. B., McMillan, M., Meister, R., Milne, G., Mougnot, J., Muir, A., Nicolas, J. P., Paden, J., Payne, A. J., Pritchard, H., Rignot, E., Rott, H., Sorensen, L. S., Scambos, T. A., Scheuchl, B., Schrama, E. J. O., Smith, B., Sundal, A.

- V., van Angelen, J. H., van de Berg, W. J., van den Broeke, M. R., Vaughan, D. G., Velicogna, I., Wahr, J., Whitehouse, P. L., Wingham, D. J., Yi, D. H., Young, D., and Zwally, H. J.: A reconciled estimate of ice-sheet mass balance. *Science*, 338(6111), 1183–1189, doi:10.1126/science.1228102, 2012.
- Smagorinsky, J.: General circulation experiments with the primitive equations: I. The basic experiment, *Mon. Wea. Rev.*, 91, 99–164, doi:10.1175/1520-0493(1963)091<0099:GCEWTP>2.3.CO;2, 1963.
- 5 Stevens, L. A., Straneo, F., Das, S. B., Plueddemann, A. J., Kukulya, A. L., and Morlighem, M.: Linking glacially modified waters to catchment-scale subglacial discharge using autonomous underwater vehicle observations, *The Cryosphere*, 10, 417–432, doi:10.5194/tc-10-417-2016, 2016.
- Straneo, F., Sutherland, D. A., Holland, D. M., Gladish, C., Hamilton, G. S., Johnson, H. L., Rignot, E., Xu, Y., and Koppes, M.: Characteristics of ocean waters reaching Greenland's glaciers, *Ann. Glaciol.*, 53(60), 202–210, doi:10.3189/2012AoG60A059, 2012.
- 10 *Straneo, F. and Cenedese, C.: The Dynamics of Greenland's Glacial Fjords and Their Role in Climate, Ann. Rev. Mar. Sci., 7, 89–112, doi:10.1146/annurev-marine-010213-135133, 2015.*
- Straneo, F. and Heimbach, P.: North Atlantic warming and the retreat of Greenland's outlet glaciers, *Nature*, 504(7478), 36–43, doi:10.1038/nature12854, 2013.
- 15 Straneo, F., Curry, R. G., Sutherland, D. A., Hamilton, G. S., Cenedese, C., Våge, K., and Stearns, L. A.: Impact of fjord dynamics and glacial runoff on the circulation near Helheim Glacier, *Nature Geoscience*, 3, 182–186, doi:10.1038/ngeo1109, 2011.
- Sugiyama, S., Sakakibara, D., Tsutaki, S., Maruyama, M., and Sawagaki, T.: Glacier dynamics near the calving front of Bowdoin Glacier, northwestern Greenland, *J. Glaciol.*, 61(226), 223–232, doi:10.3189/2015JoG14J127, 2015.
- 20 Sutherland, D. A. and Pickart, R. S.: The East Greenland Coastal Current: structure, variability, and forcing, *Prog. Oceanogr.*, 78, 58–77, doi:10.1016/j.pocean.2007.09.006, 2008.
- van den Broeke, M. R., Enderlin, E. M., Howat, I. M., Kuipers Munneke, P., Noël, B. P. Y., van de Berg, W. J., van Meijgaard, E., and Wouters, B.: On the recent contribution of the Greenland ice sheet to sea level change, The Cryosphere, 10, 1933–1946, doi:10.5194/tc-10-1933-2016, 2016.*
- 25 Xu, Y., Rignot, E., Fenty, I., and Menemenlis, D.: Subaqueous melting of Store Glacier, West Greenland from three-dimensional, high resolution numerical modeling and ocean observations, *Geophys. Res. Lett.*, 40, 4648–4653, doi:10.1002/grl.50825, 2013.

**Table 1.** List of model runs. Run names, initial stratifications, and values of inflow velocity ( $V_{sg}$ :  $\text{m s}^{-1}$ ) and flux of subglacial discharge ( $Q_{sg}$ :  $\text{m}^3 \text{s}^{-1}$ ).

| Run name | Initial stratification | $V_{sg}$ ( $\text{m s}^{-1}$ ) | $Q_{sg}$ ( $\text{m}^3 \text{s}^{-1}$ ) |
|----------|------------------------|--------------------------------|-----------------------------------------|
| Q10      | Observed in 2014       | 0.025                          | 10                                      |
| CTRL     | "                      | 0.09                           | 36                                      |
| Q45      | "                      | 0.1125                         | 45                                      |
| Q100     | "                      | 0.25                           | 100                                     |
| ST16     | Observed in 2016       | 0.09                           | 36                                      |
| ST16Q45  | "                      | 0.1125                         | 45                                      |

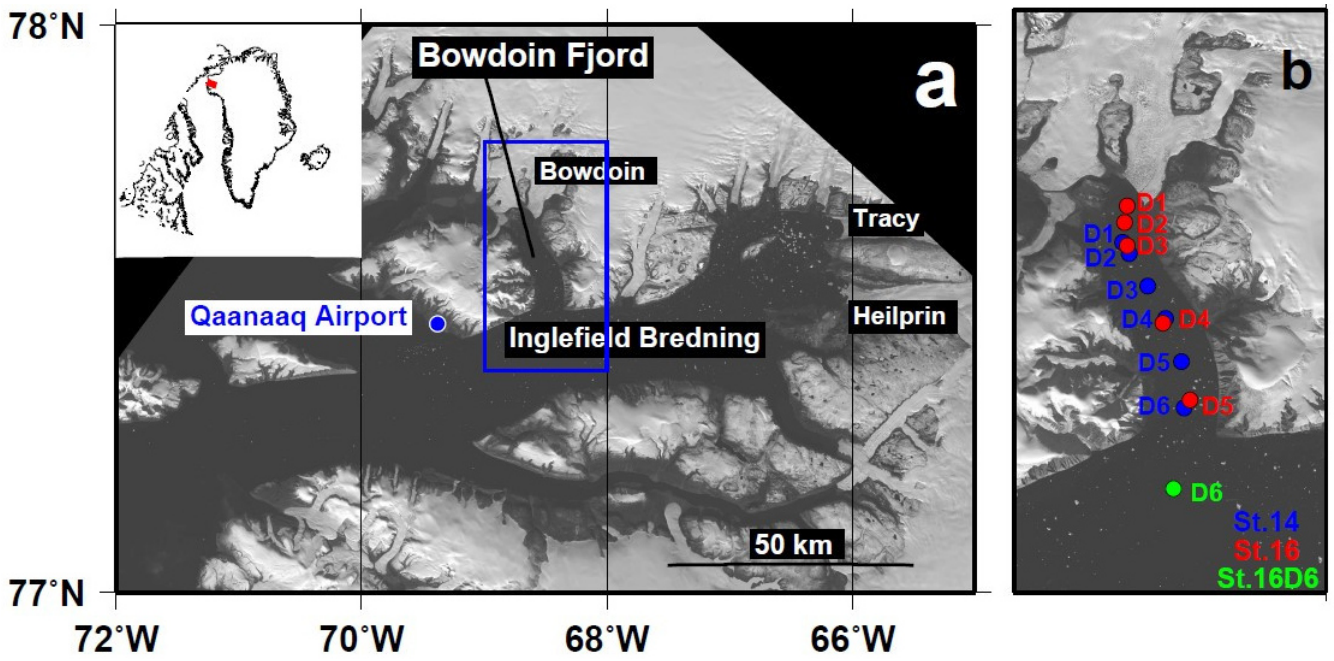

**Figure 1.** Study region in Bowdoin Fjord in northwestern Greenland. (a) Landsat image (6 September 2014) showing northwestern Greenland. The blue box indicates the area shown in (b). The inset shows the location of the region in Greenland. (b) Location of the CTD observation sites indicated by dots (blue in 2014, red in 2016, both inside Bowdoin Fjord, and green in 2016, outside Bowdoin Fjord).

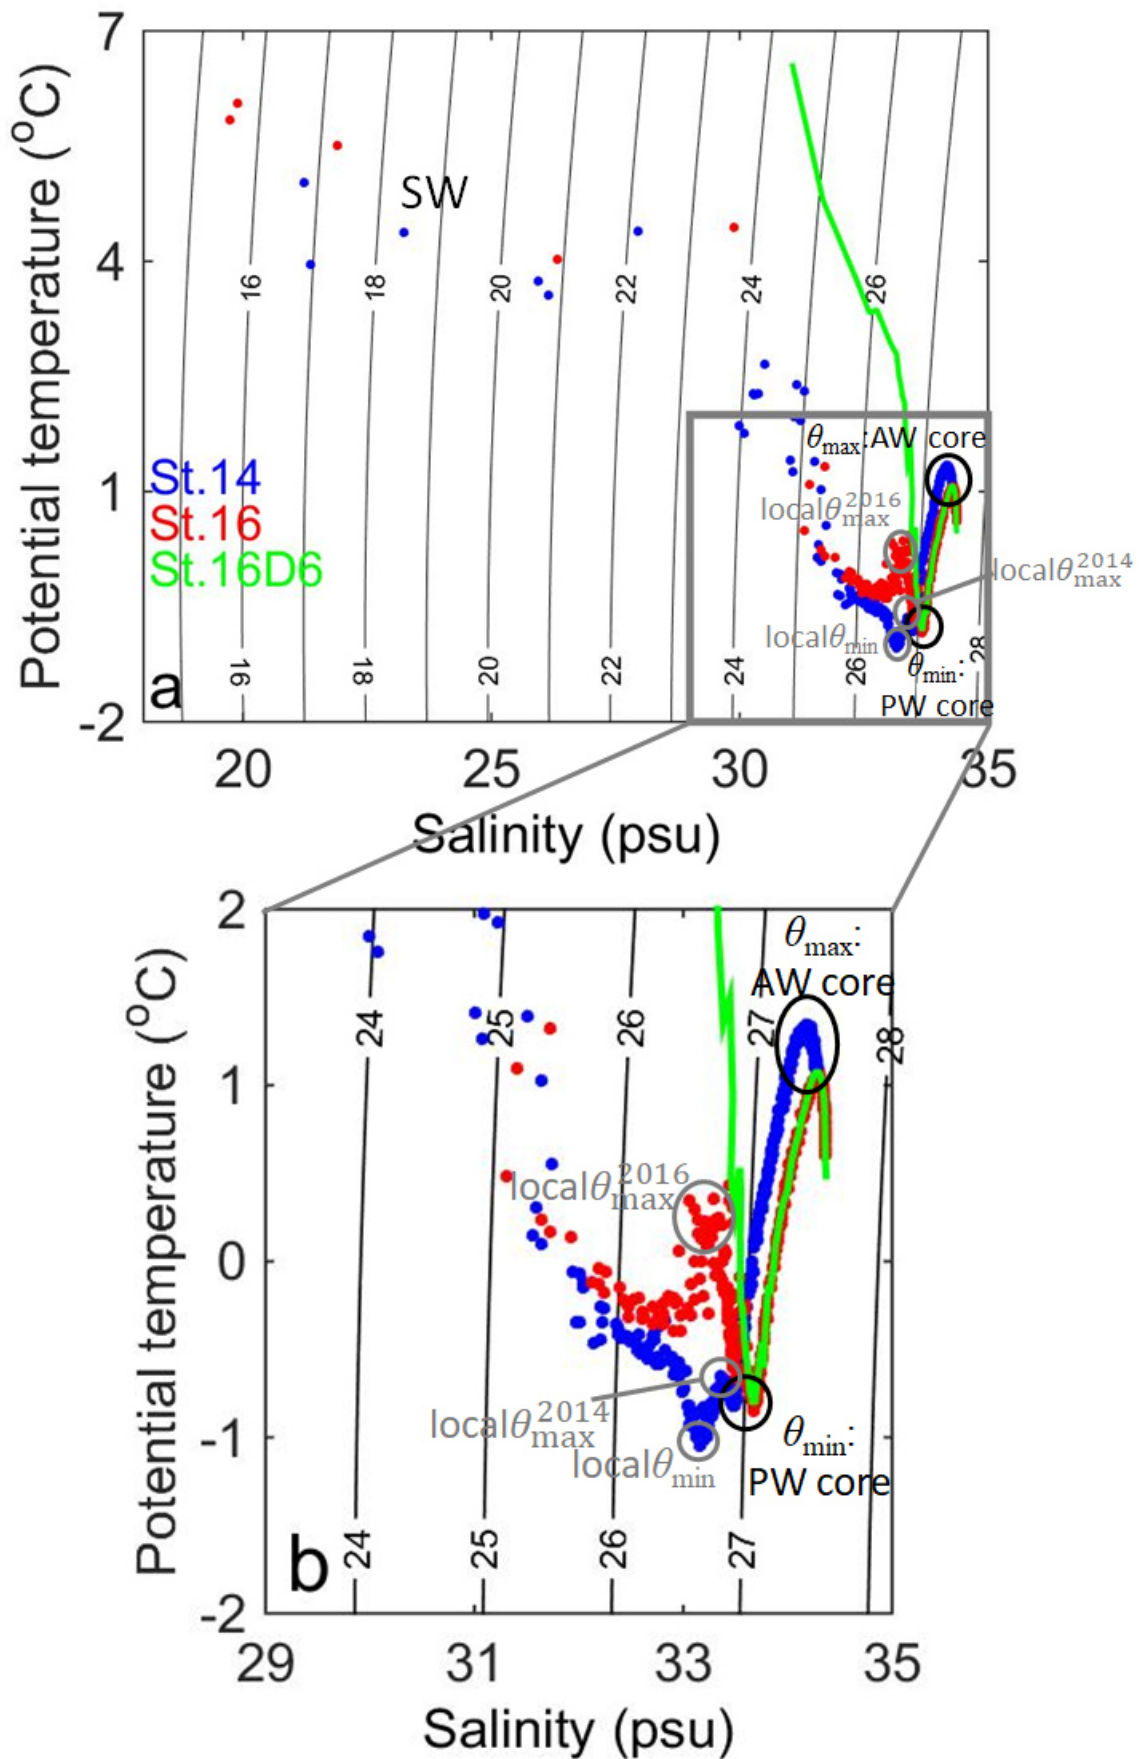

**Figure 2.** (a) Potential temperature–salinity diagrams for the data from 2014 and 2016. Dots are shown at 5 m intervals. The color of the markers corresponds to the sampling sites as indicated in Fig. 1b (blue in 2014, red at Stations 16D1–5, and green at Station 16D6). The potential densities are shown by the black isopycnal contours. The gray box indicates the domain shown in Fig. 7. (b) shows the enlarged region indicated by the gray box in (a).



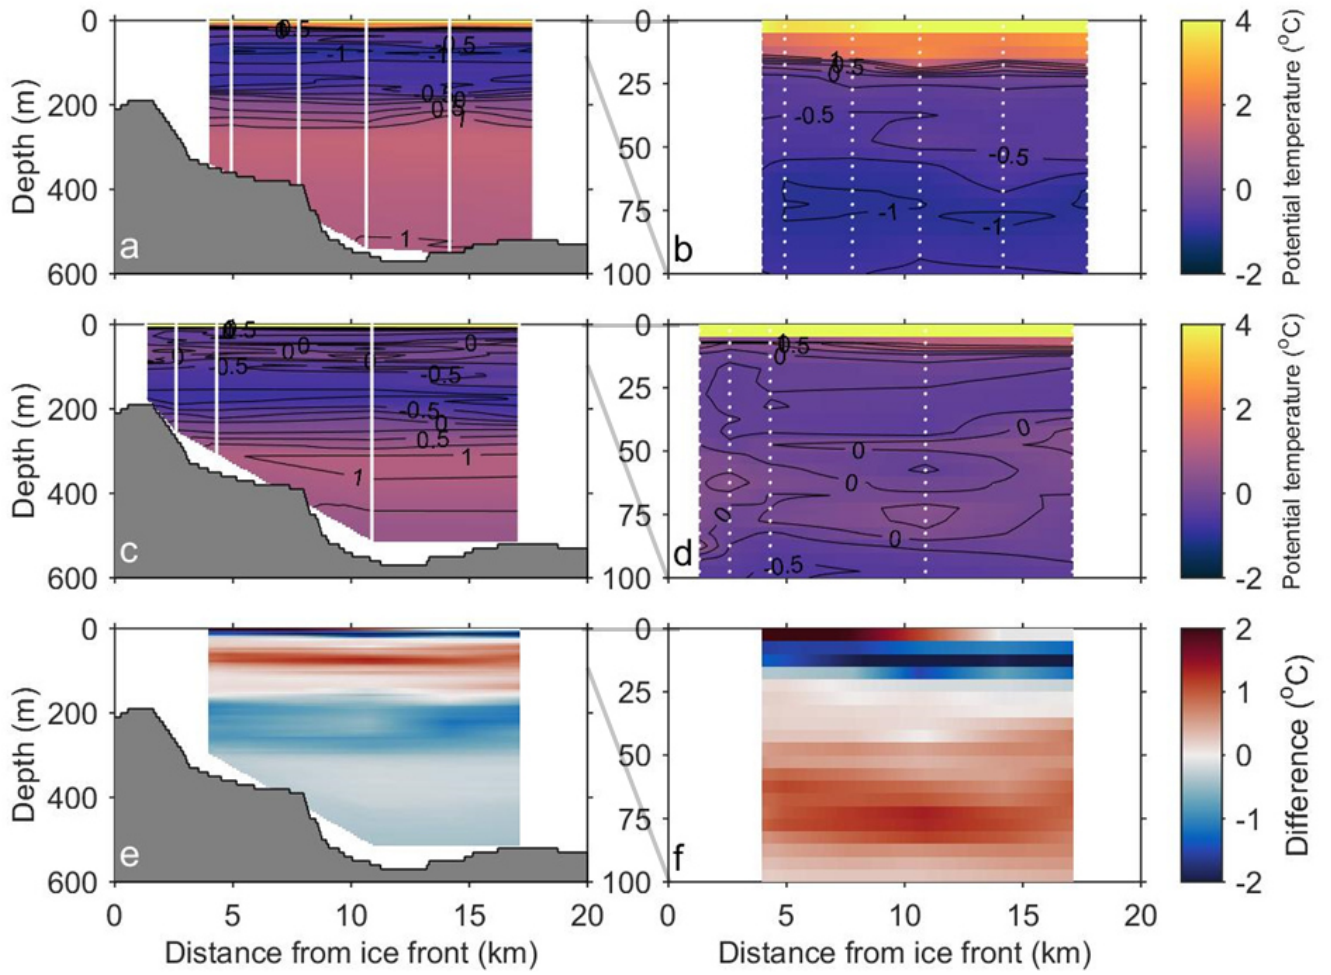

**Figure 3.** Vertical profiles of potential temperature along the centerline of Bowdoin Fjord as observed in (a) 2014 and (c) 2016. The difference between the two years (2016 – 2014) is shown in (e). (b), (d), and (f) show the enlarged region from the sea surface to 100 m.

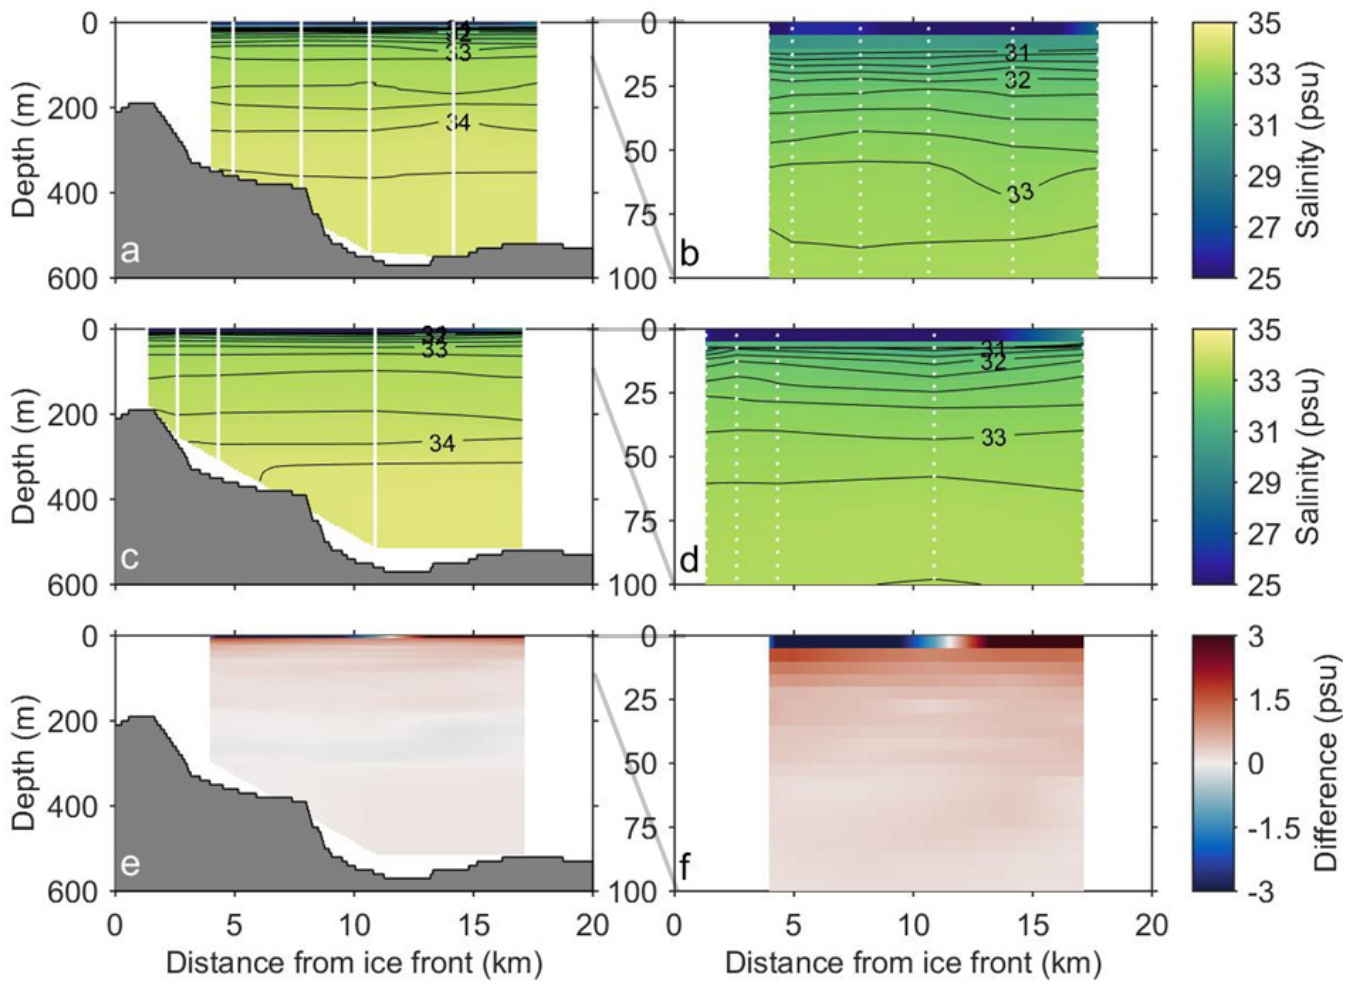

Figure 4. Same as Fig. 3, but for salinity.

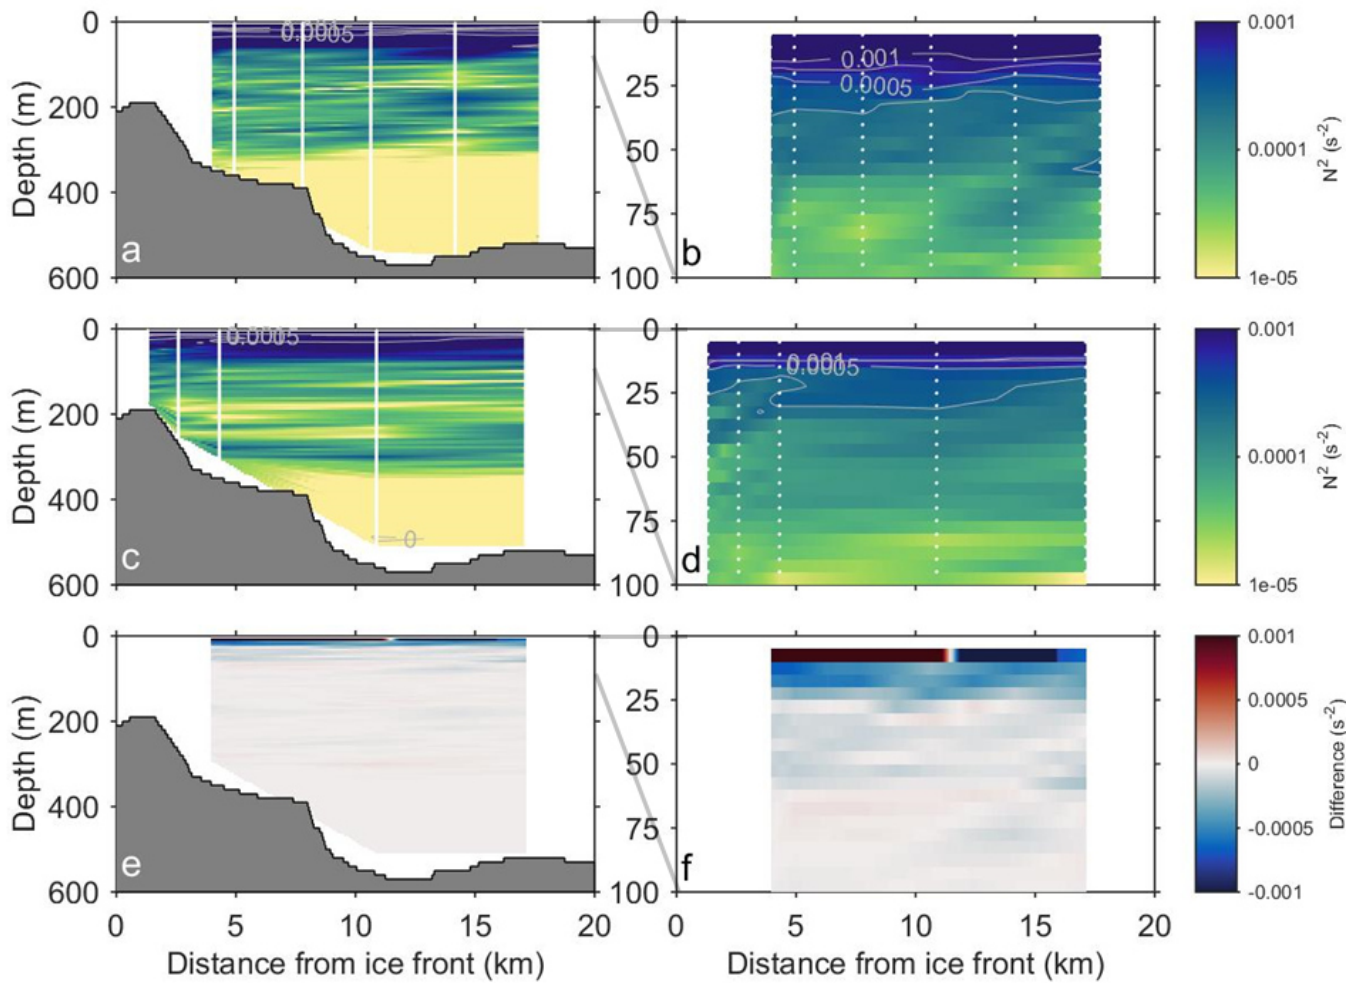

**Figure 5.** Same as Fig. 3, but for square of Brunt-Väisälä frequency ( $N^2$ ).

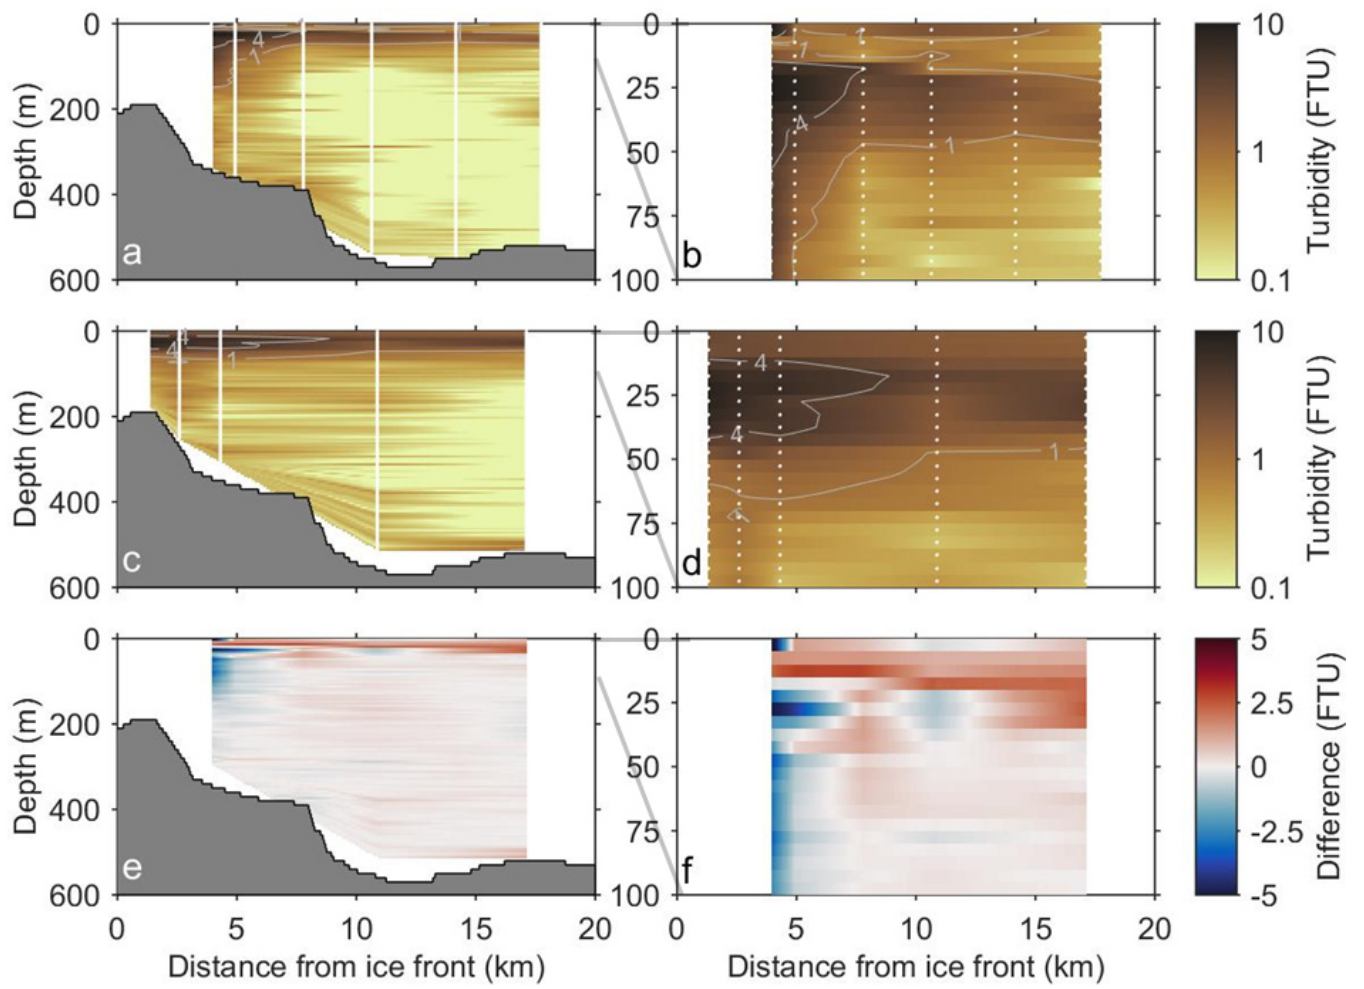

Figure 6. Same as Fig. 3, but for turbidity.

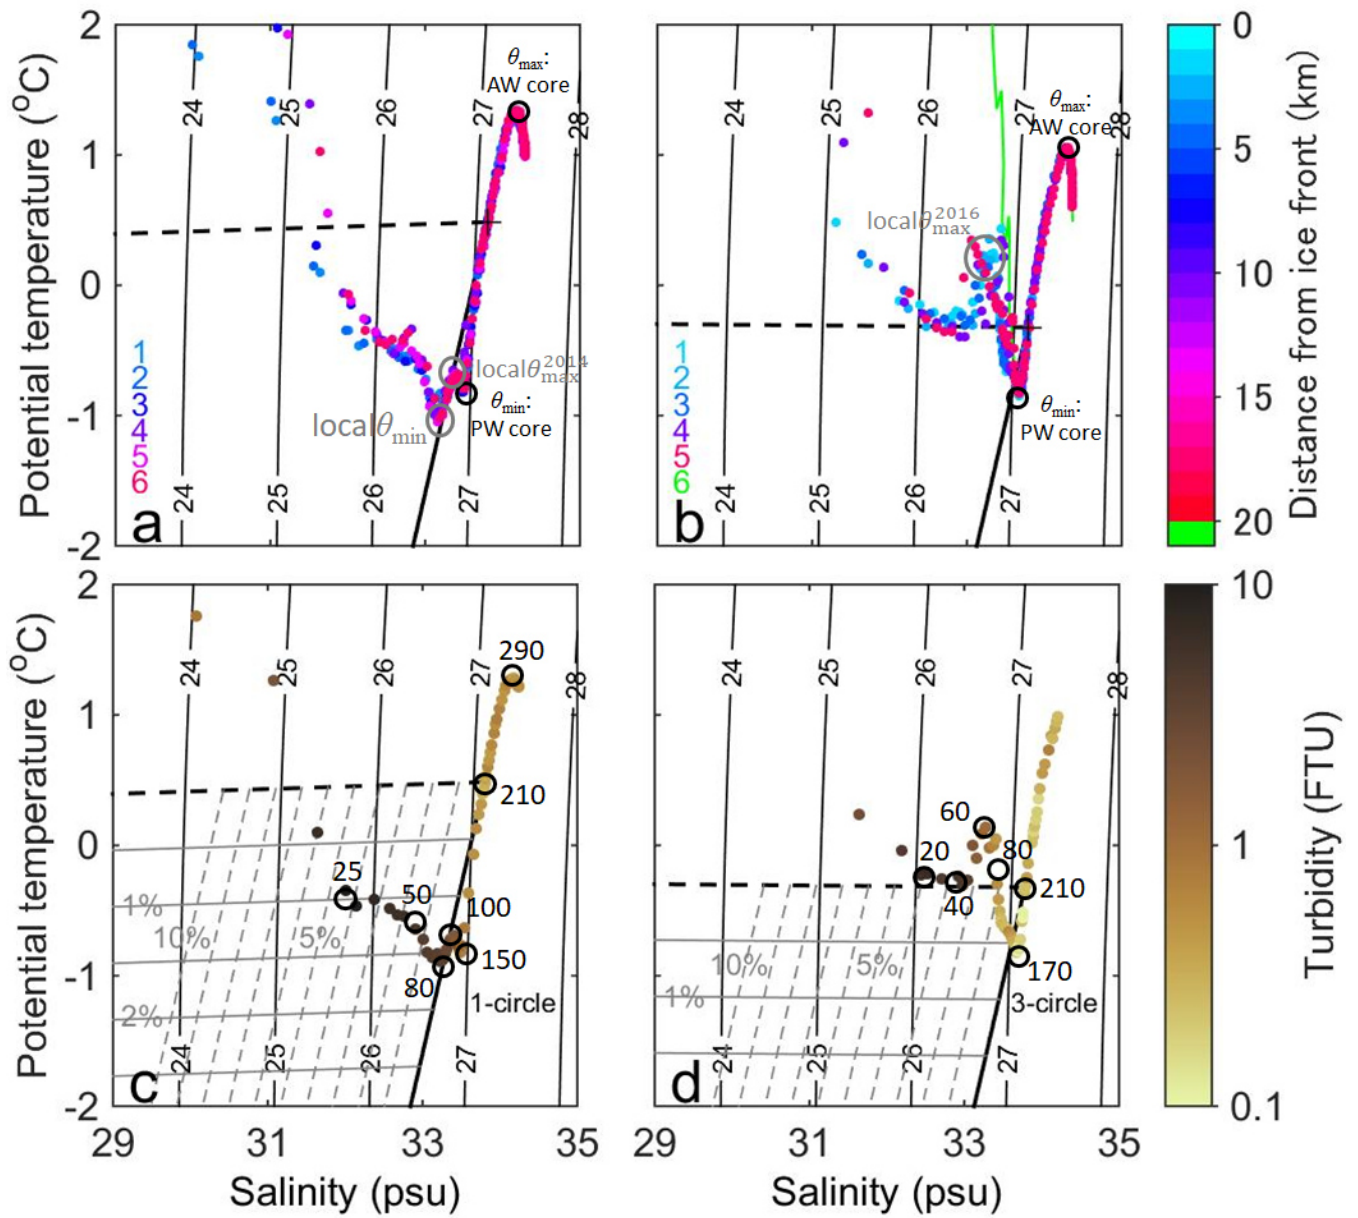

**Figure 7.** Potential temperature–salinity diagrams of the freshwater **endmember** fractions in (a, c) 2014 and (b, d) 2016 (as shown in Fig. 2b). The solid and dashed black lines represent the theoretical melt and runoff line, respectively. In (a) and (b), the data are plotted for stations 1–6, and the color scale indicates the station number. In (c) and (d), the data are plotted for stations with ~4 km distance from the ice front (14D1 and 16D3 at depths  $\geq 5$  m). The color of markers denotes turbidity. The solid and dashed gray lines represent the fractions of submarine meltwater (where the line intervals are 0.5–2.5 %) and subglacial discharge (where the line intervals are 1–10 %), respectively. The black numbers outside the circles indicate the depth.

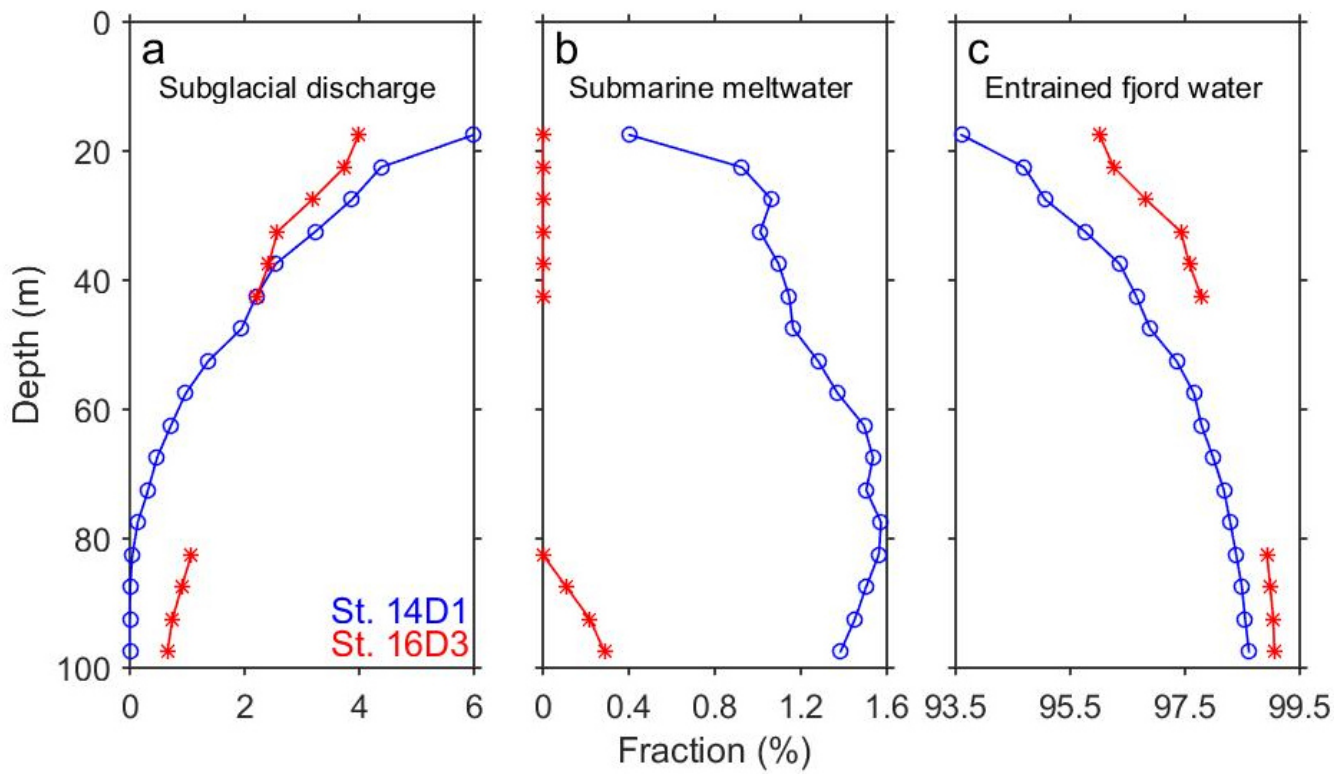

**Figure 8.** Vertical profiles of the three water mass fractions of (a) subglacial discharge, (b) submarine meltwater, and (c) entrained fjord water at Stations 14D1 (blue) and 16D3 (red).

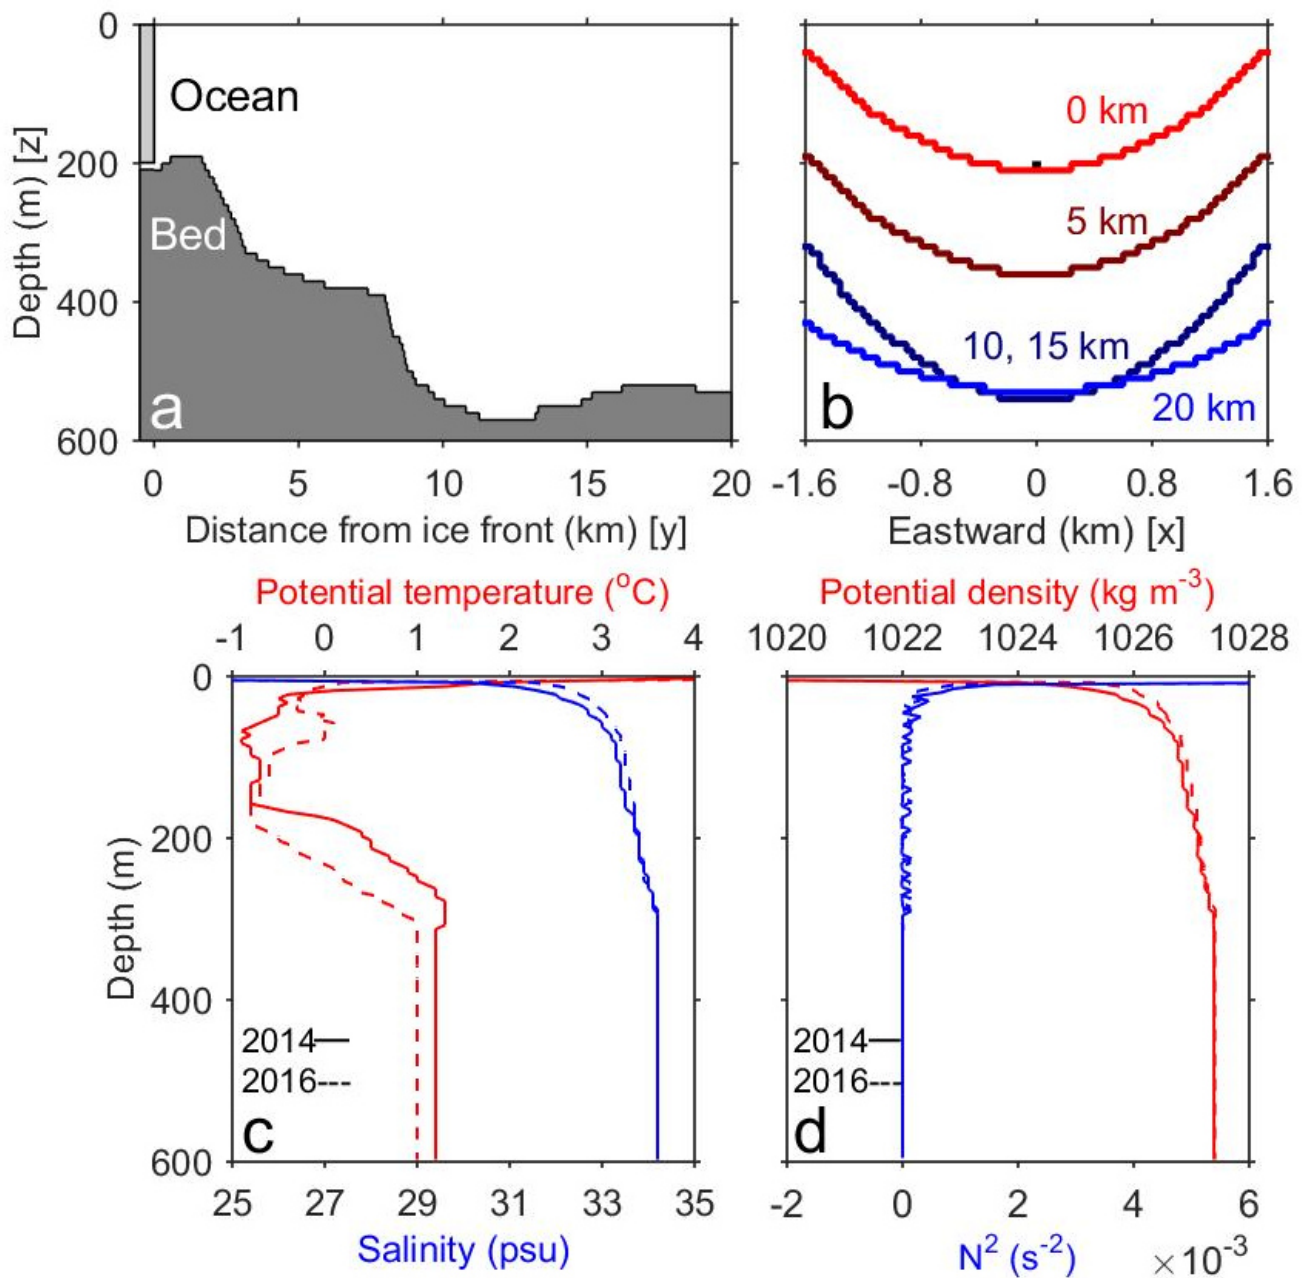

**Figure 9.** Numerical model settings. (a) Ocean depth along the centerline of Bowdoin Fjord (from north to south). The space between the glacier and the sea bed indicates a 10-m-high subglacial drainage conduit. (b) Depth across the fjord (from west to east) at 0, 5, 10, 15, and 20 km from the ice front. The box indicates the subglacial drainage conduit at the center of the fjord (40 m wide  $\times$  10 m high; 400 m<sup>2</sup>). Initial vertical profiles of (c) potential temperature, salinity, (d) potential density, and the square of Brunt-Väisälä frequency (N<sup>2</sup>) computed from (c).

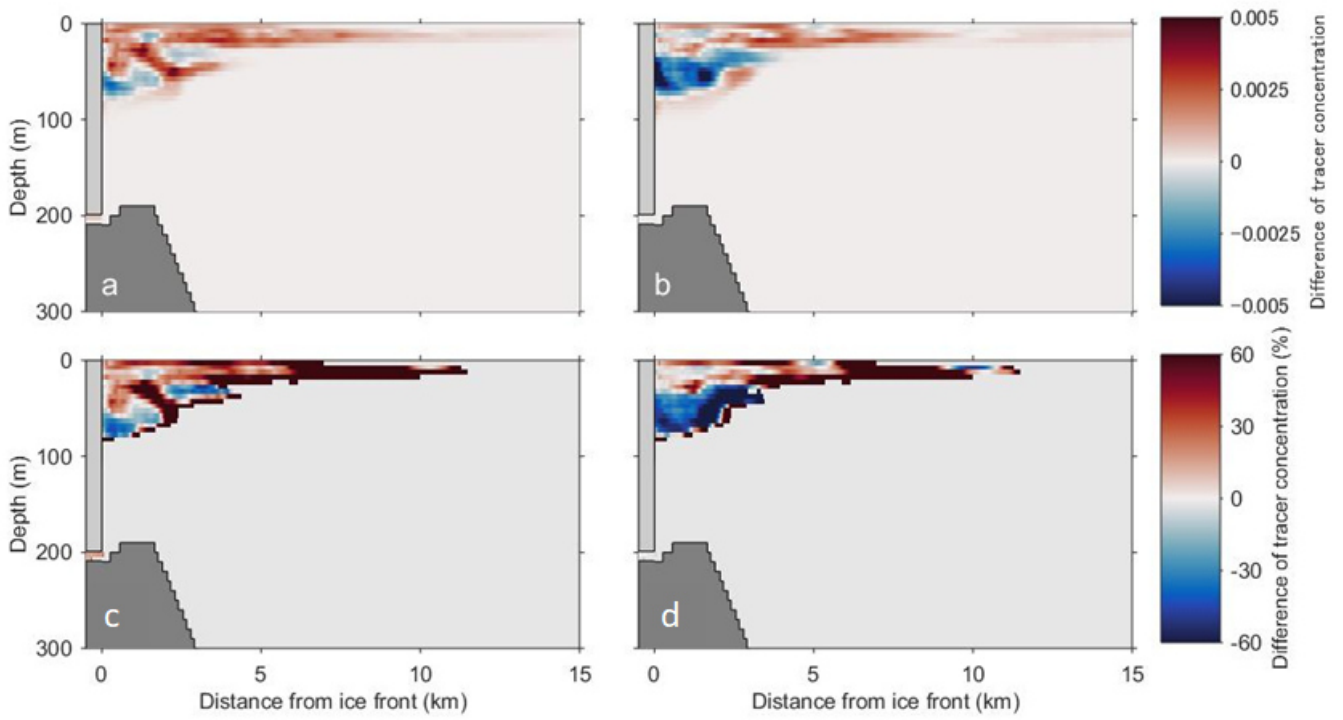

**Figure 10.** (a) Cross-fjord averaged difference between subglacial discharge tracer concentrations for Q45 ( $Q_{sg} = 45 \text{ m}^3 \text{ s}^{-1}$ ) and CTRL ( $Q_{sg} = 36 \text{ m}^3 \text{ s}^{-1}$ ) using the same initial stratification conditions. The difference after integration for 41 h is shown. (b) Difference between the results for the same amount of discharge using initial stratifications as observed in 2016 and 2014 (ST16 - CTRL). (c), and (d) Percentage of the results in (a), and (b), respectively.



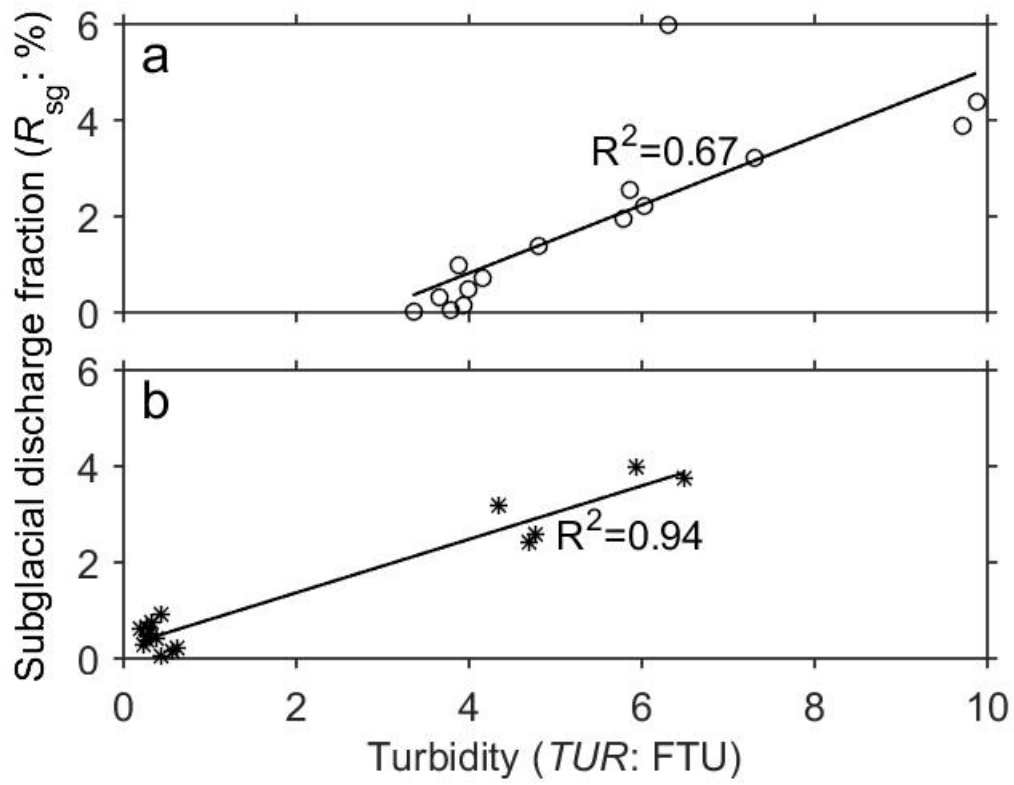

**Figure 11.** Scatter plots of turbidity and the subglacial discharge fraction at Stations (a) 14D1 (data in the meltwater quadrant of Fig. 7c) and (b) 16D3 (data in the meltwater quadrant and that including the data points at a depth of 15–40 m in Fig. 7d). The solid lines represent the linear regression of the data.

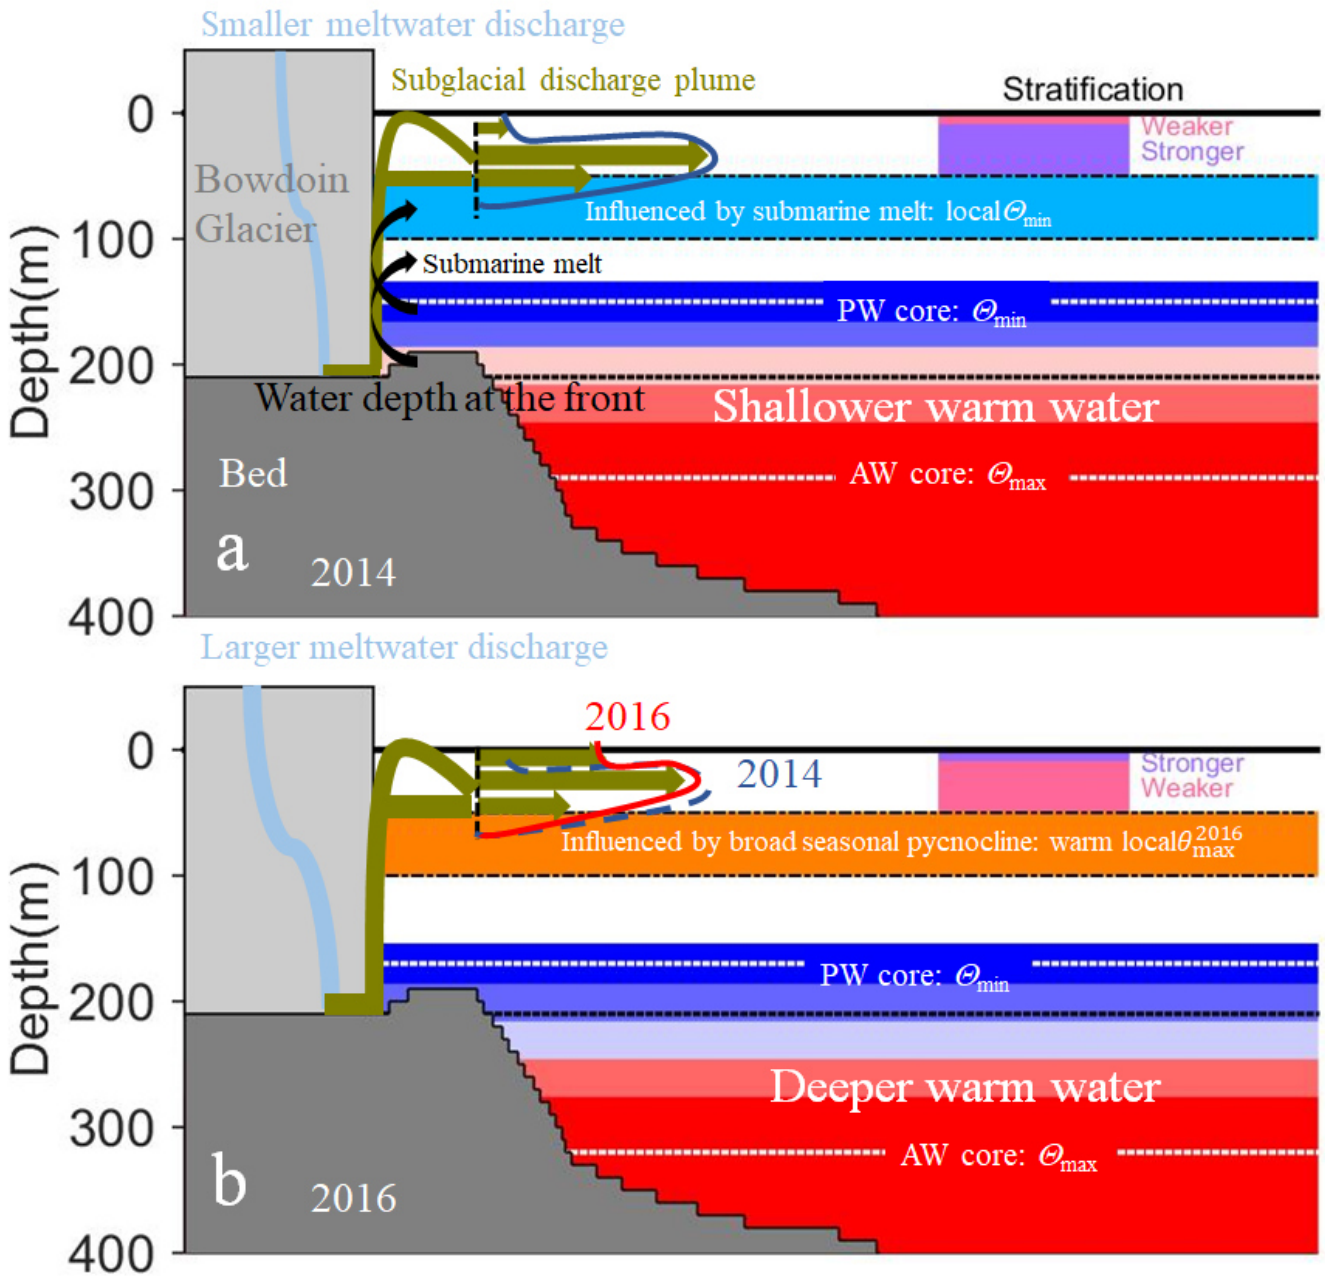

**Figure 12.** Schematic diagram of the possible glacial discharge and water mass structure of Bowdoin Fjord in (a) 2014 and (b) 2016.

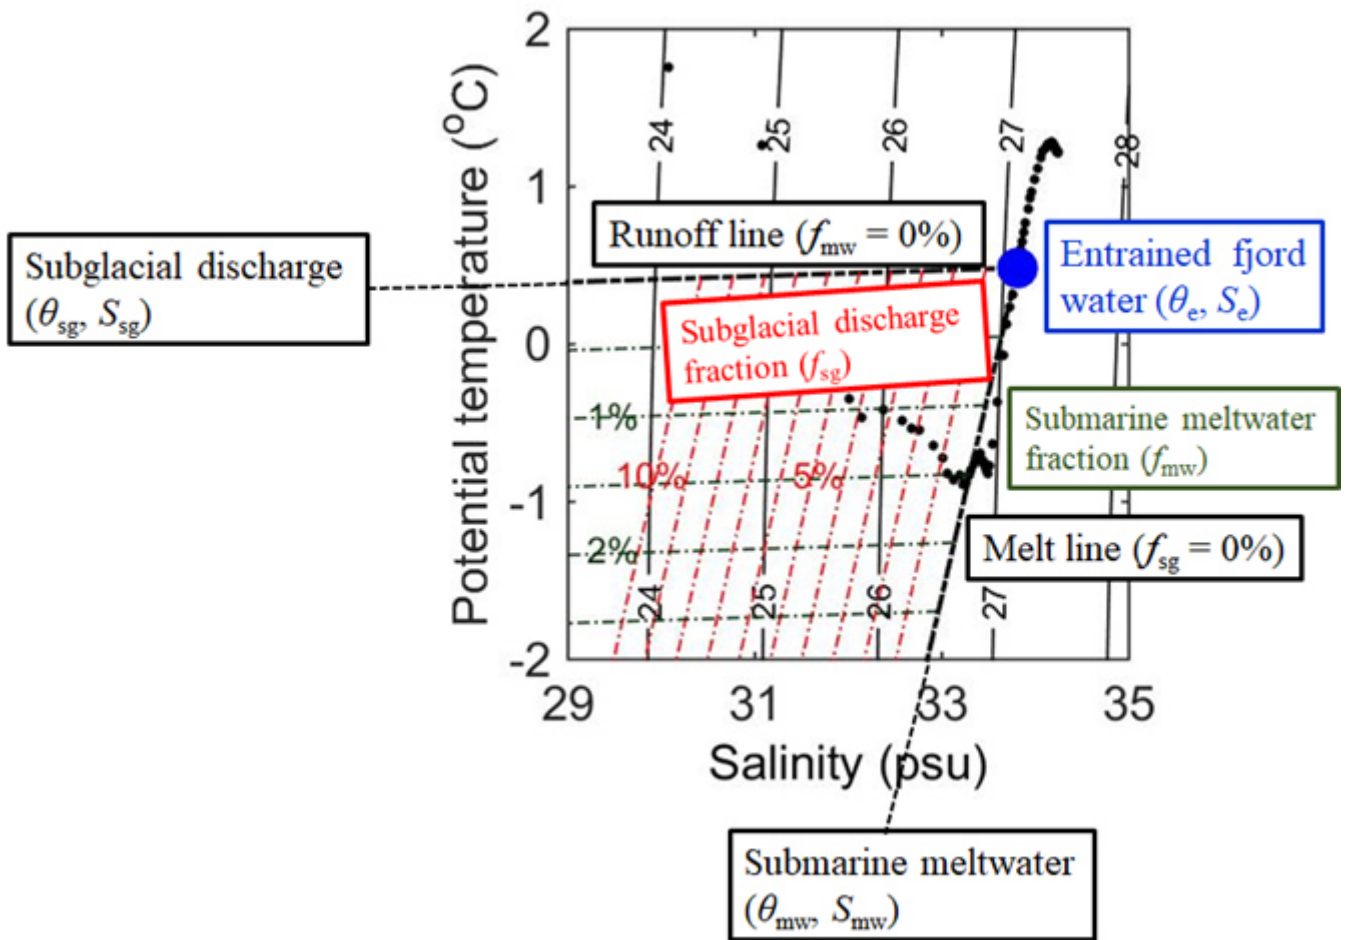

**Figure A1.** Freshwater fraction analysis in the potential temperature–salinity diagram. The black dots represent the data observed at depths  $\geq 5$  m of Station 14D1.

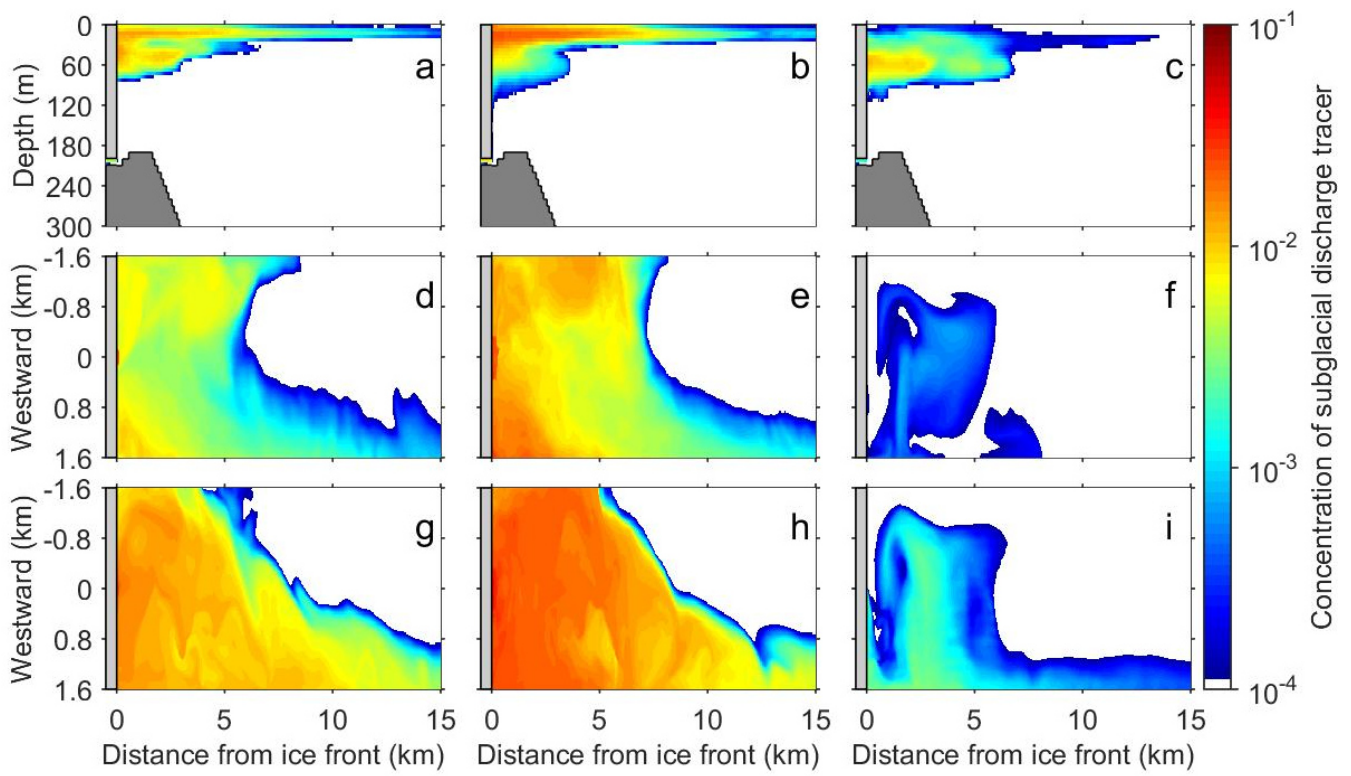

**Figure B1.** (a–c) Cross-fjord averaged vertical profiles of the subglacial discharge tracer concentration. Horizontal distribution of the tracer concentration (d–f) at the fjord surface (depth: 0–5 m) and (g–i) at a depth of 10–15 m. Experimental results are obtained (a, d, and g) in CTRL after integration for 62 h, (b, e, and h) in Q100 after 33 h, and (c, f, and i) in Q10 after 153 h.

5 The integration time in each experiment is equivalent to the time required for the first arrival of the tracer.

**Figure B2.** Depth of the maximum concentration of subglacial discharge tracer along the centerline of the fjord.

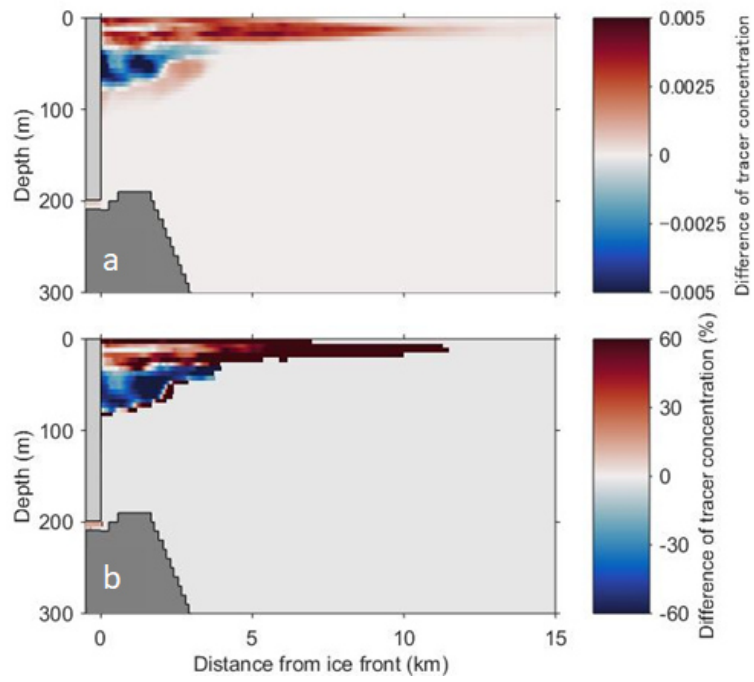

**Figure C1.** Cross-fjord averaged difference between the results for the different amount of discharge, and using initial stratifications as observed in 2016 and 2014 (ST16Q45 – CTRL). The difference after integration for 41 h is shown. (b) Percentage of the results in (a).

5
